# Supplementary material for: Design, synthesis, crystal structure and fungicidal activity of (E)-5-(methoxyimino)-3,5-dihydrobenzo[e][1,2]oxazepin-4(1H)-one analogues
Source: Royal Society of Chemistry journal article supplement (doi:10.1039/c7md00025a), 2017-01-01
Supplement: c7md00025a1.pdf [file c7md00025a1.pdf]

## Design, synthesis, crystal structure and fungicidal activity of (E)-5-(methoxyimino)-3,5-dihydrobenzo[e][1,2]oxazepin-4(1H)-one analogues

Dongyan Yang, Chuan Wan, MengMeng He, Chuanliang Che, Yumei Xiao, Bin Fu, and Zhaohai Qin\*

College of Science, China Agricultural University, Beijing 100193, China

### Table of Contents

|                                                                                   |     |
|-----------------------------------------------------------------------------------|-----|
| <sup>1</sup> H NMR, <sup>13</sup> C NMR and HRMS spectrum of title compounds..... | S2  |
| Single crystal X-Ray data for compound <b>5-09</b> .....                          | S38 |

## <sup>1</sup>H NMR, <sup>13</sup>C NMR and HRMS spectrum of title compounds

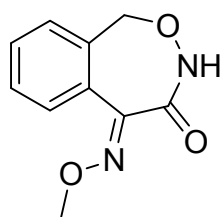

Data for (E)-5-(methoxyimino)-3,5-dihydrobenzo[e][1,2]oxazepin-4(1H)-one (**4**): yield 81 %; white solid; mp 146 °C; <sup>1</sup>H NMR (300 MHz, DMSO) δ 11.63 (s, 1H), 7.60 (d, *J* = 7.8 Hz, 1H), 7.42 (dt, *J* = 7.6, 3.8 Hz, 1H), 7.32 (t, *J* = 7.1 Hz, 1H), 7.22 (d, *J* = 7.7 Hz, 1H), 5.19 (s, 2H), 3.90 (s, 3H). <sup>13</sup>C NMR (75 MHz, DMSO) δ 168.42, 136.45, 130.44, 130.11, 126.53, 125.92, 124.63, 76.08, 62.52. HRMS (ESI) *m/z* calcd for C<sub>10</sub>H<sub>10</sub>N<sub>2</sub>O<sub>3</sub> (M+H)<sup>+</sup> 207.0764, found 207.0765.

<sup>1</sup>H NMR (300 MHz, DMSO) δ 11.63 (s, 1H), 7.60 (d, *J* = 7.8 Hz, 1H), 7.42 (dt, *J* = 7.6, 3.8 Hz, 1H), 7.32 (t, *J* = 7.1 Hz, 1H), 7.22 (d, *J* = 7.7 Hz, 1H), 5.19 (s, 2H), 3.90 (s, 3H).

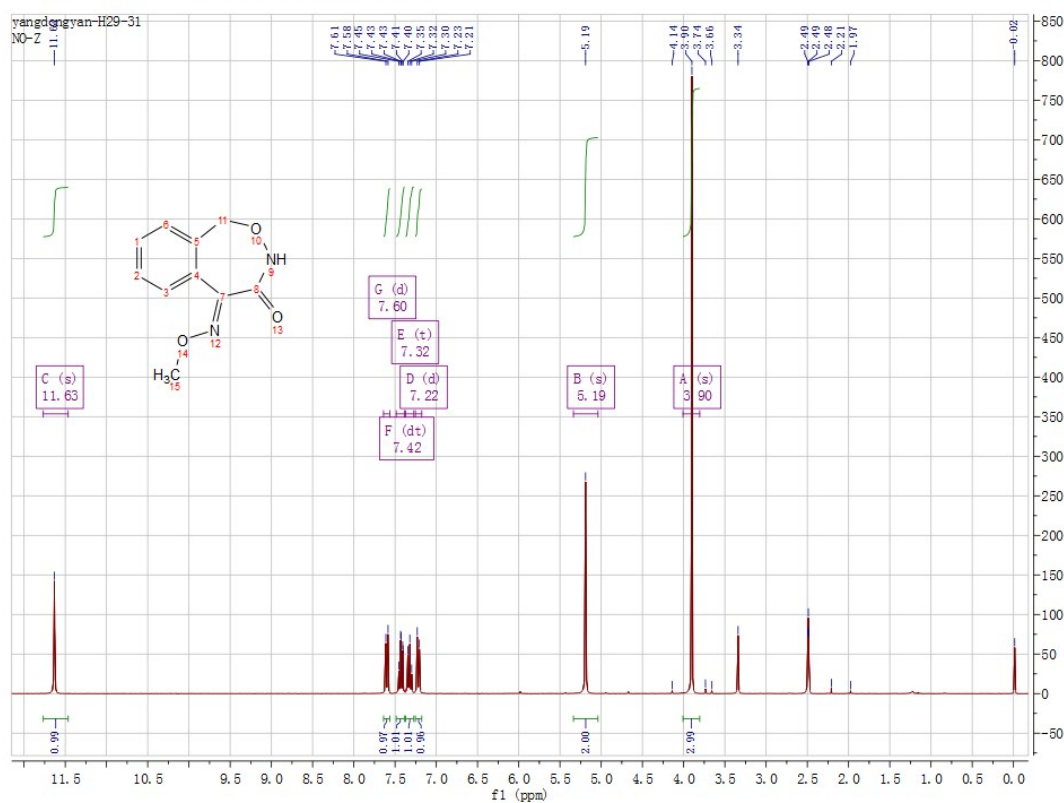

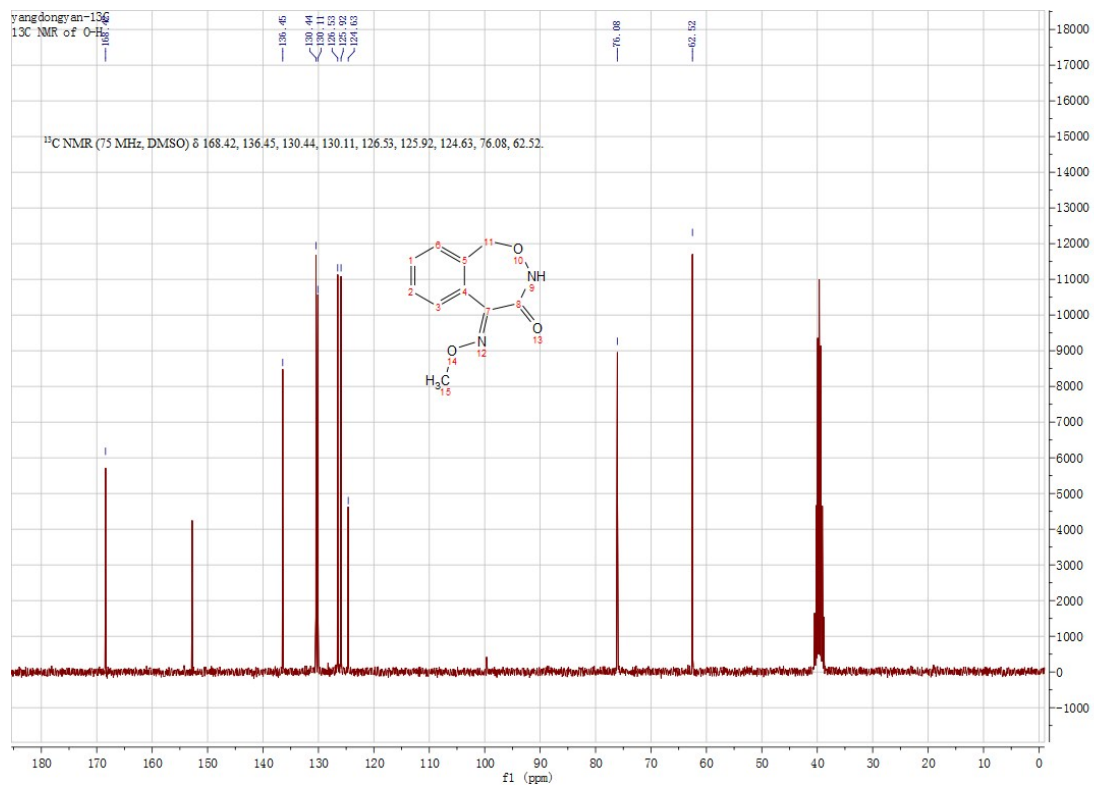

1\_160522113656 #62 RT: 0.66 AV: 1 NL: 9.02E8  
 T: FTMS + p ESI Full ms [150.00-1500.00]

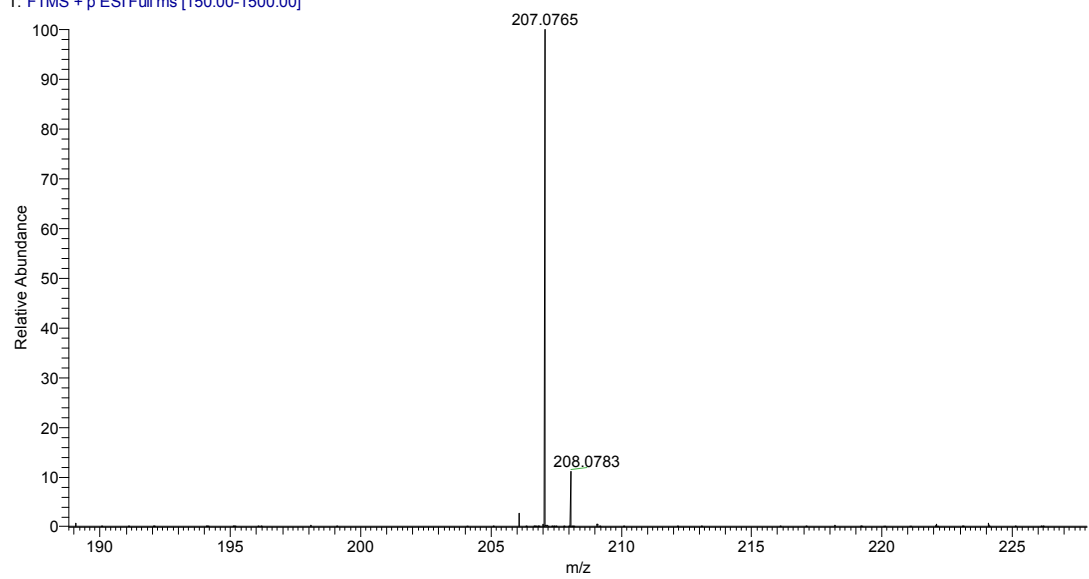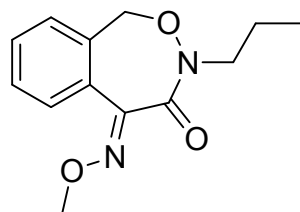

Data for (E)-5-(methoxyimino)-3-propyl-3,5-dihydrobenzo[e][1,2]oxazepin-4(1H)-one (**5-01**). White crystal; yield, 52%; mp: 83-85°C.  $^1\text{H}$  NMR (300 MHz,  $\text{CDCl}_3$ )  $\delta$  7.80 (d,  $J = 7.6$  Hz, 1H), 7.46 – 7.31 (m, 2H), 7.13 (d,  $J = 7.7$  Hz, 1H), 5.23 (s, 2H), 4.08 (s, 3H), 3.84 – 3.53 (m, 2H), 1.80 (tt,  $J = 14.3, 7.1$  Hz, 2H), 1.01 (t,  $J = 7.4$  Hz, 3H).  $^{13}\text{C}$  NMR (75 MHz,  $\text{CDCl}_3$ )  $\delta$  167.27, 152.38, 135.28, 130.84, 129.60, 126.24, 124.86, 124.60, 74.26, 62.62, 47.50, 19.90, 10.93. HRMS (ESI)  $m/z$  calcd for  $\text{C}_{13}\text{H}_{16}\text{N}_2\text{O}_3$  ( $\text{M}+\text{H}$ ) $^+$  249.1234, found 249.1234.

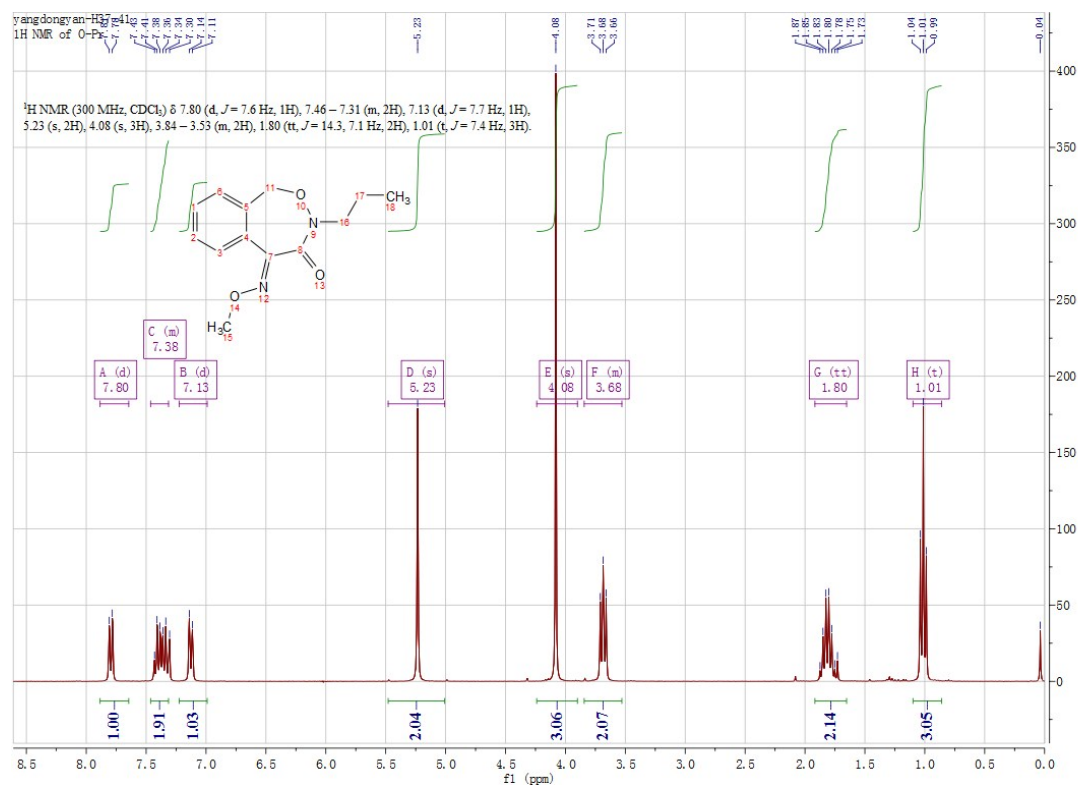

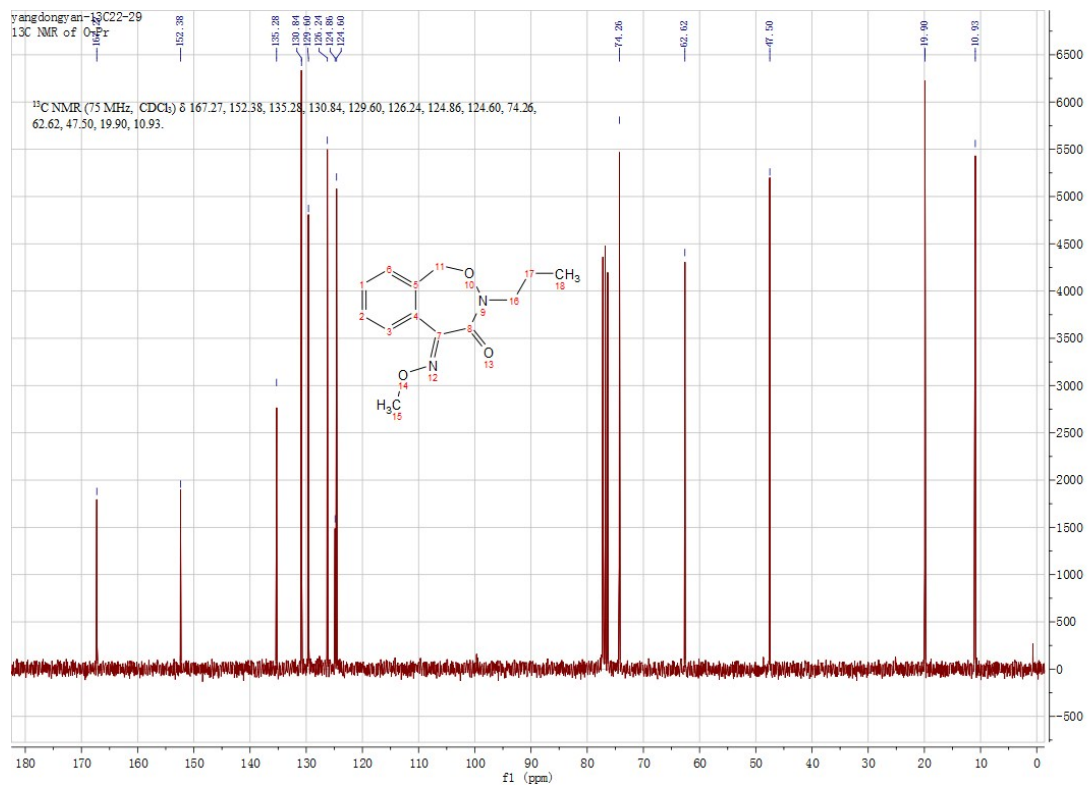

9 #74 RT: 0.78 AV: 1 NL: 7.88E9  
 T: FTMS + p ESI Full ms [150.00-1500.00]

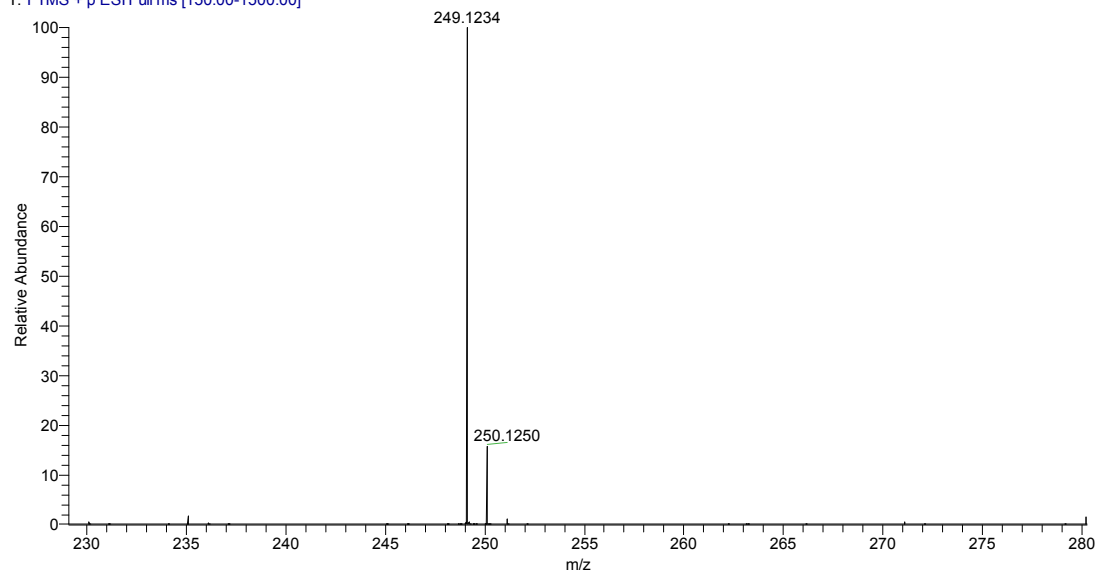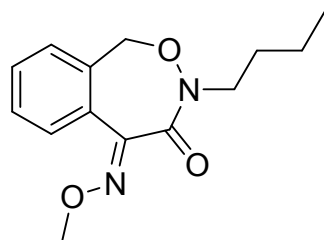

Data for (E)-3-butyl-5-(methoxyimino)-3,5-dihydrobenzo[e][1,2]oxazepin-4(1H)-one (**5-02**): yield 57 %; white solid; mp 54-55 °C;  $^1\text{H}$  NMR (300 MHz,  $\text{CDCl}_3$ )  $\delta$  7.88 – 7.71 (m, 1H), 7.40 (ddd,  $J = 20.1, 9.9, 3.9$  Hz, 2H), 7.13 (d,  $J = 7.7$  Hz, 1H), 5.24 (s, 2H), 4.09 (s, 3H), 3.81 – 3.62 (m, 2H), 1.77 (dt,  $J = 15.0, 7.6$  Hz, 2H), 1.44 (dq,  $J = 14.7, 7.3$  Hz, 2H), 1.00 (t,  $J = 7.3$  Hz, 3H).  $^{13}\text{C}$  NMR (75 MHz,  $\text{CDCl}_3$ )  $\delta$  167.23, 152.38, 135.28, 130.86, 129.59, 126.24, 124.88, 124.59, 74.28, 62.62, 45.69, 28.59, 19.68, 13.40. HRMS (ESI)  $m/z$  calcd for  $\text{C}_{14}\text{H}_{18}\text{N}_2\text{O}_3$  ( $\text{M}+\text{H}$ ) $^+$  263.1390, found 263.1391.

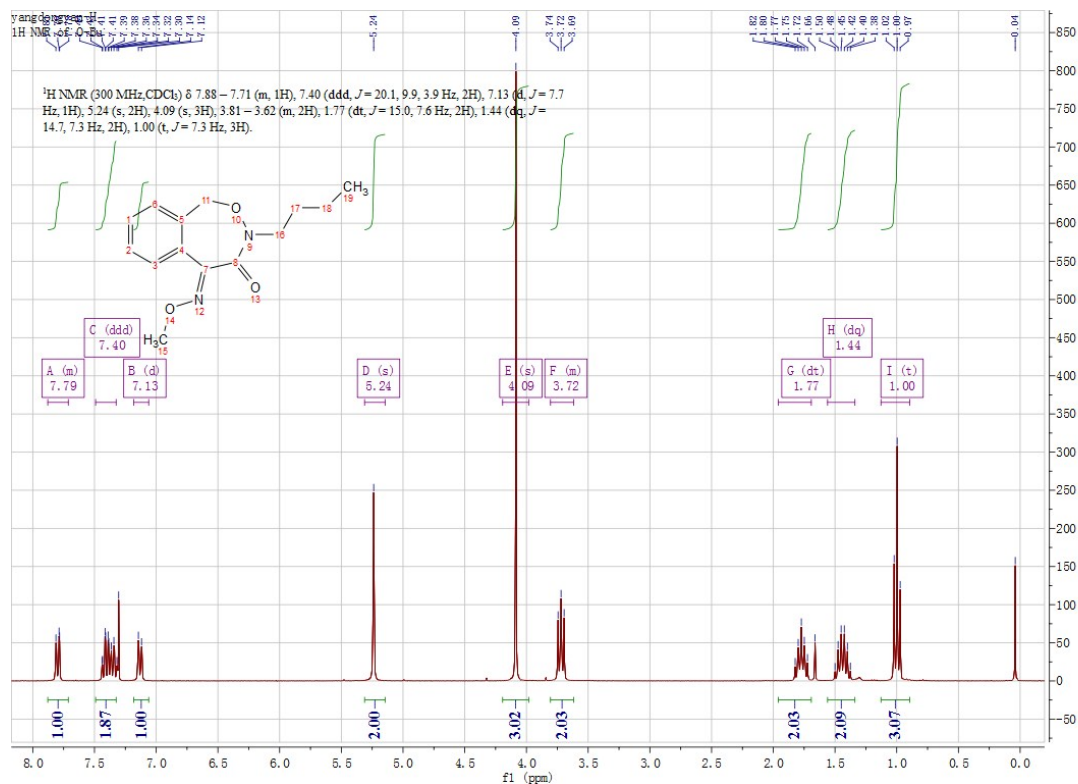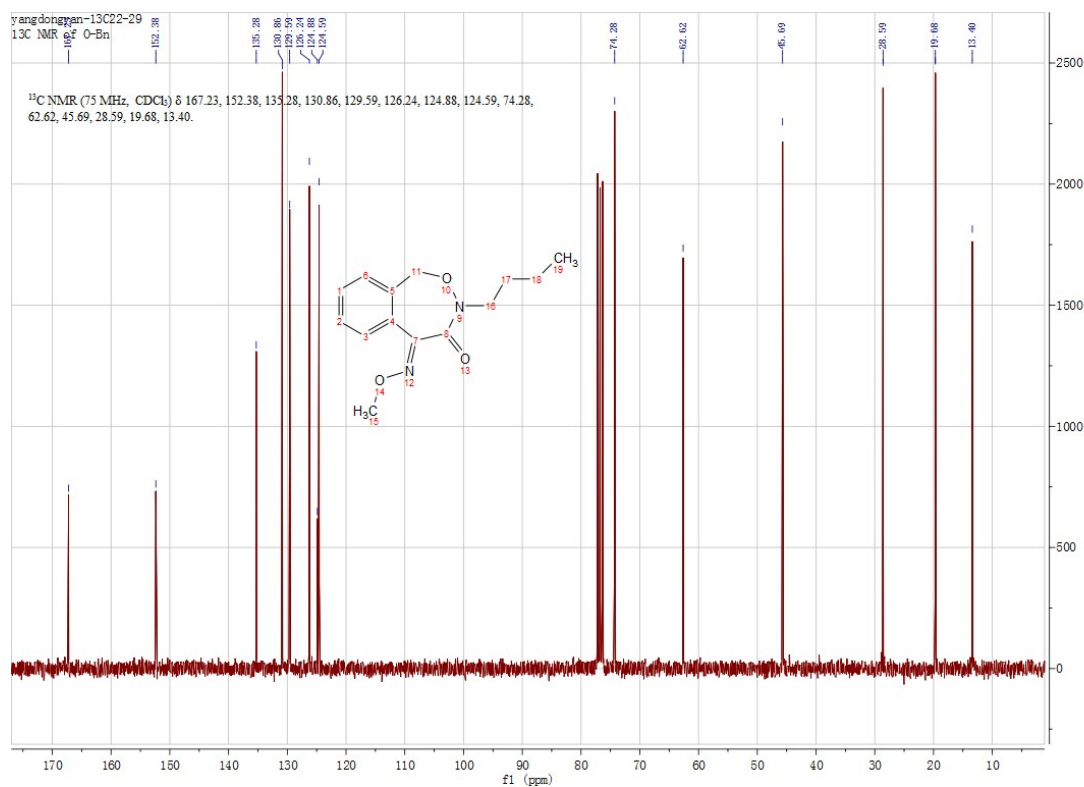

13 #74 RT: 0.79 AV: 1 NL: 6.00E9  
T: FTMS + p ESI Full ms [150.00-1500.00]

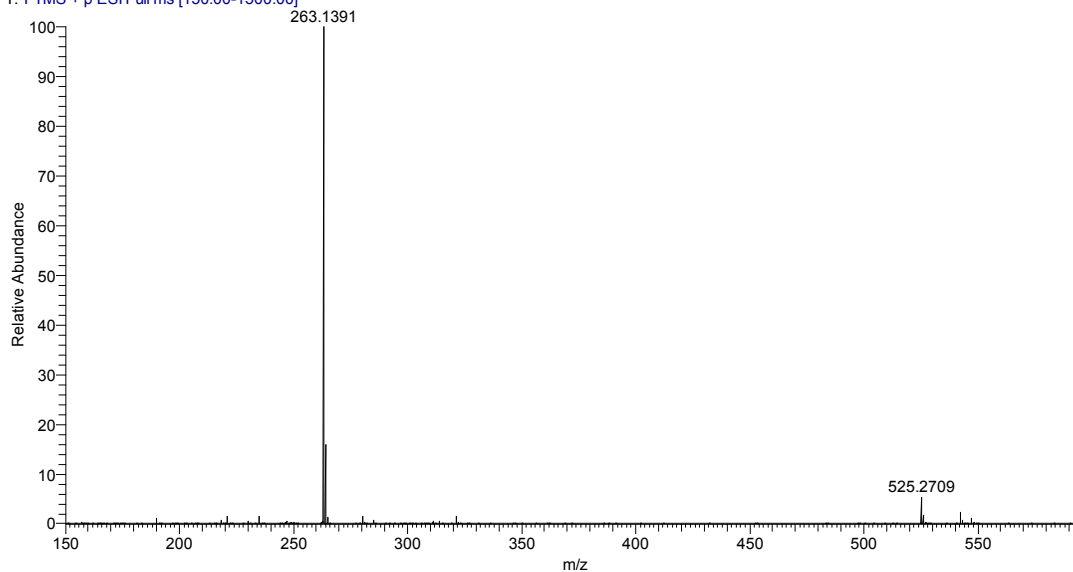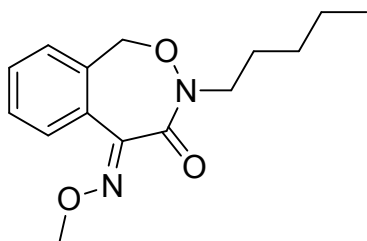

Data for (E)-5-(methoxyimino)-3-pentyl-3,5-dihydrobenzo[e][1,2]oxazepin-4(1H)-one (**5-03**): yield 69 %; colorless oil; <sup>1</sup>H NMR (300 MHz, CDCl<sub>3</sub>) δ 7.77 – 7.66 (m, 1H), 7.41 – 7.18 (m, 2H), 7.06 (d, *J* = 7.5 Hz, 1H), 5.16 (s, 2H), 4.00 (s, 3H), 3.70 – 3.54 (m, 2H), 1.84 – 1.60 (m, 2H), 1.45 – 1.19 (m, 4H), 0.88 (t, *J* = 6.8 Hz, 3H). <sup>13</sup>C NMR (75 MHz, CDCl<sub>3</sub>) δ 167.05, 152.39, 135.29, 130.71, 129.55, 126.13, 124.76, 124.63, 74.16, 62.48, 45.76, 28.47, 26.12, 21.91, 13.54. HRMS (ESI) *m/z* calcd for C<sub>15</sub>H<sub>20</sub>N<sub>2</sub>O<sub>3</sub> (M+H)<sup>+</sup> 277.1547, found 277.1547.

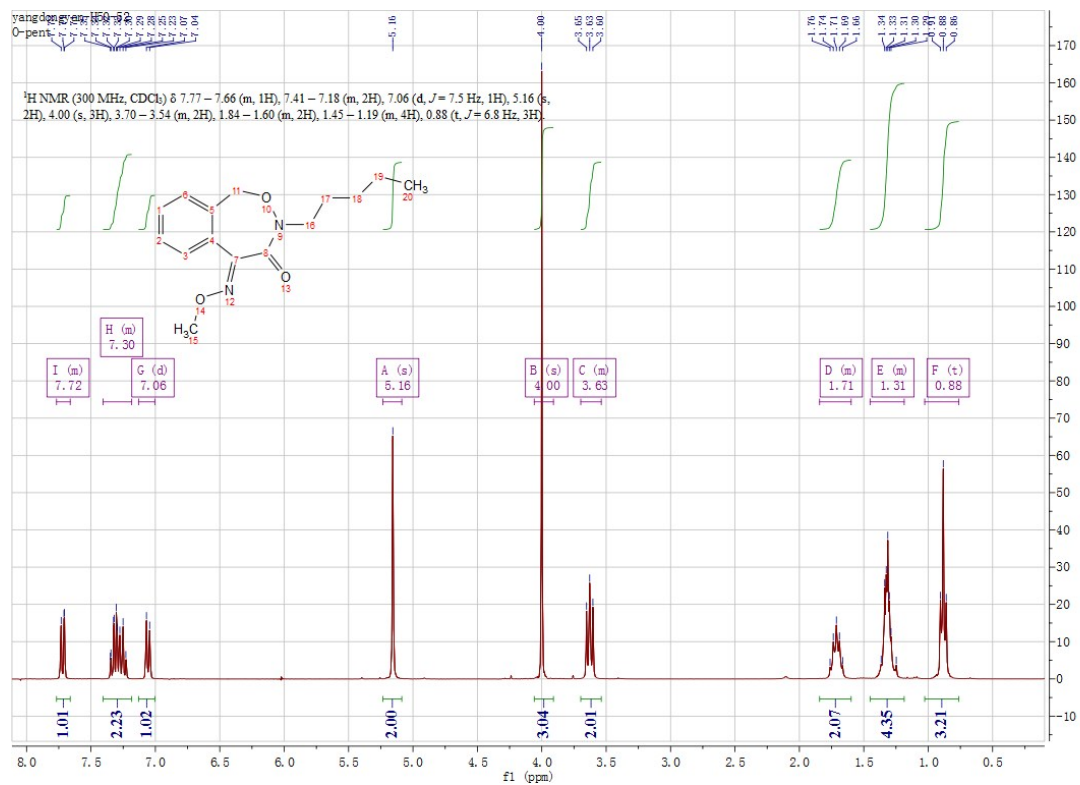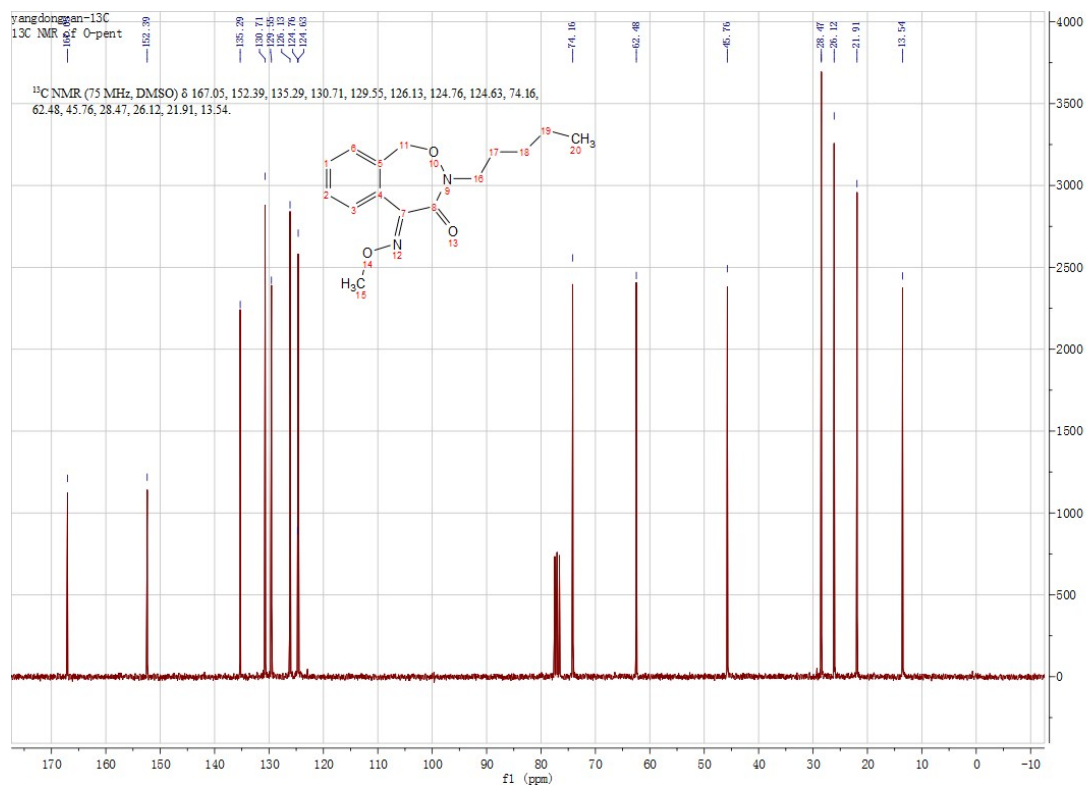



14 #270 RT: 2.93 AV: 1 NL: 1.33E10  
T: FTMS + p ESI Full ms [150.00-1500.00]

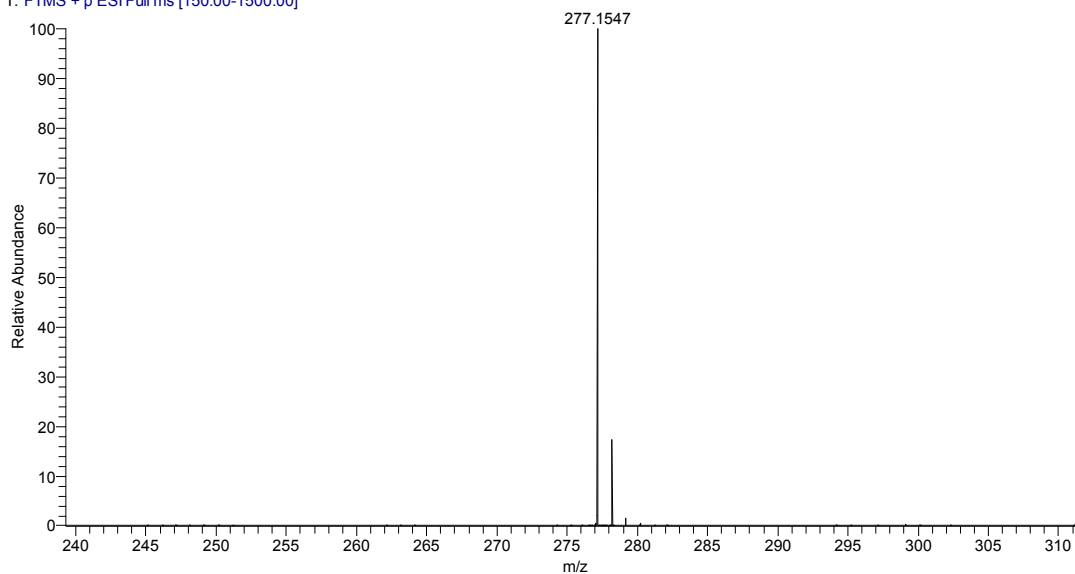

Data for (*E*)-3-hexyl-5-(methoxyimino)-3,5-dihydrobenzo[*e*][1,2]oxazepin-4(1*H*)-one (**5-04**): yield 75 %; colorless oil;  $^1\text{H}$  NMR (300 MHz,  $\text{CDCl}_3$ )  $\delta$  7.71 (d,  $J = 7.6$  Hz, 1H), 7.40 – 7.16 (m, 2H), 7.04 (d,  $J = 7.6$  Hz, 1H), 5.14 (s, 2H), 3.98 (s, 3H), 3.71 – 3.48 (m, 2H), 1.68 (dd,  $J = 14.2, 7.1$  Hz, 2H), 1.39 – 1.20 (m, 6H), 0.86 (t,  $J = 6.6$  Hz, 3H).  $^{13}\text{C}$  NMR (75 MHz,  $\text{CDCl}_3$ )  $\delta$  167.06, 152.38, 135.29, 130.71, 129.54, 126.12, 124.77, 124.62, 74.17, 62.46, 45.79, 31.02, 26.39, 26.00, 22.07, 13.59. HRMS (ESI)  $m/z$  calcd for  $\text{C}_{16}\text{H}_{23}\text{N}_2\text{O}_3$  ( $\text{M}+\text{H}$ ) $^+$  291.1703, found 291.1702.

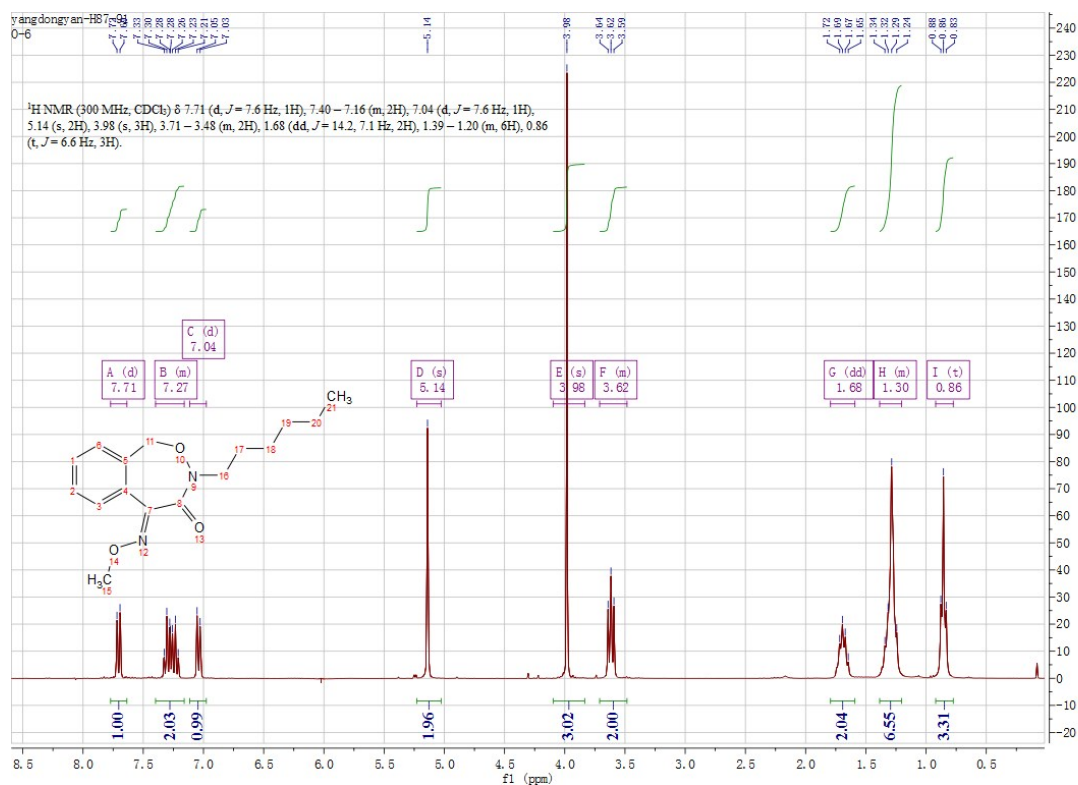

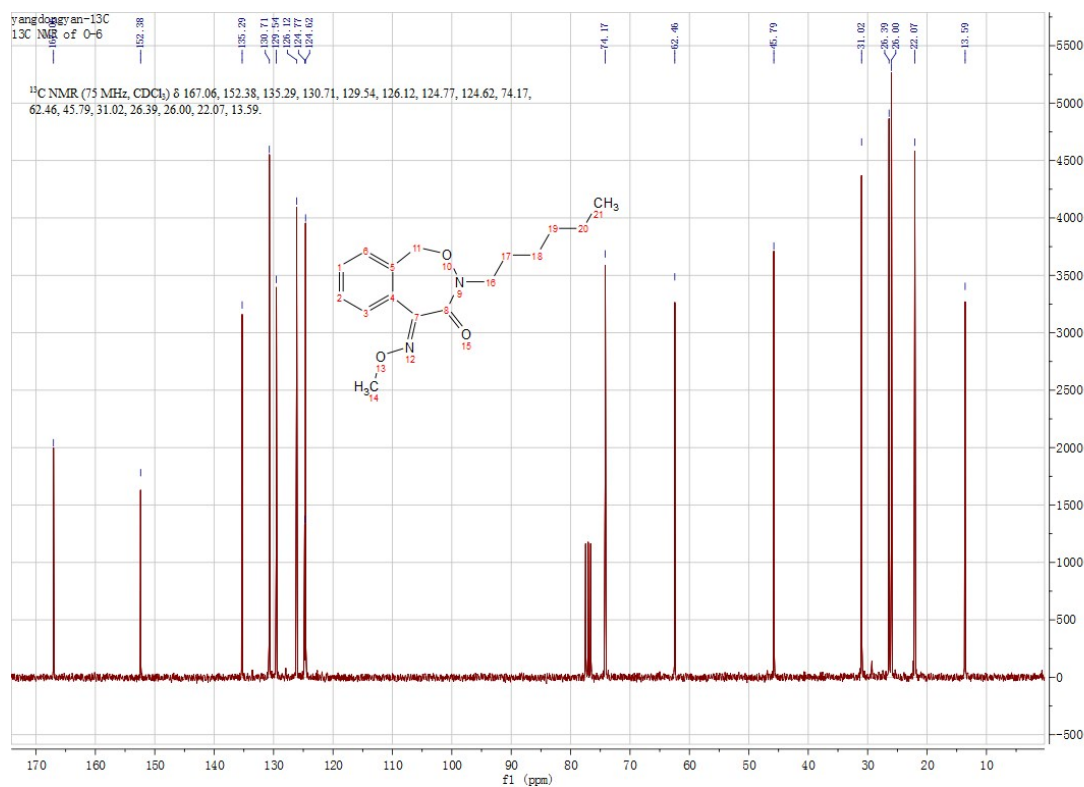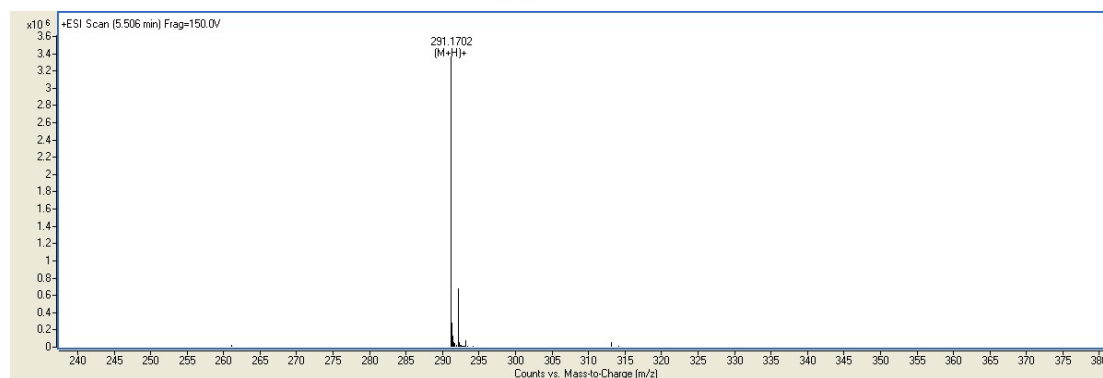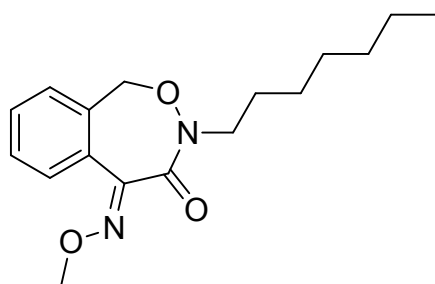

Data for *(E)*-3-heptyl-5-(methoxyimino)-3,5-dihydrobenzo[*e*][1,2]oxazepin-4(1H)-one (**5-05**): yield 73 %; colorless oil; <sup>1</sup>H NMR (300 MHz, CDCl<sub>3</sub>) δ 7.82 – 7.60 (m, 1H), 7.41 – 7.15 (m, 2H), 7.03 (d, *J* = 7.6 Hz, 1H), 5.13 (s, 2H), 3.98 (s, 3H), 3.74 – 3.51 (m, 2H), 1.79 – 1.60 (m, 2H), 1.41 – 1.18 (m, 8H), 0.85 (t, *J* = 6.7 Hz, 3H). <sup>13</sup>C NMR (75 MHz, CDCl<sub>3</sub>) δ 167.03, 152.38, 135.29, 130.69, 129.51, 126.10, 124.77, 124.61, 74.16, 62.43, 45.76, 31.23, 28.49, 26.43, 26.28, 22.13, 13.64. HRMS (ESI) *m/z* calcd for C<sub>17</sub>H<sub>25</sub>N<sub>2</sub>O<sub>3</sub> (M+H)<sup>+</sup> 305.1860, found 305.1864.

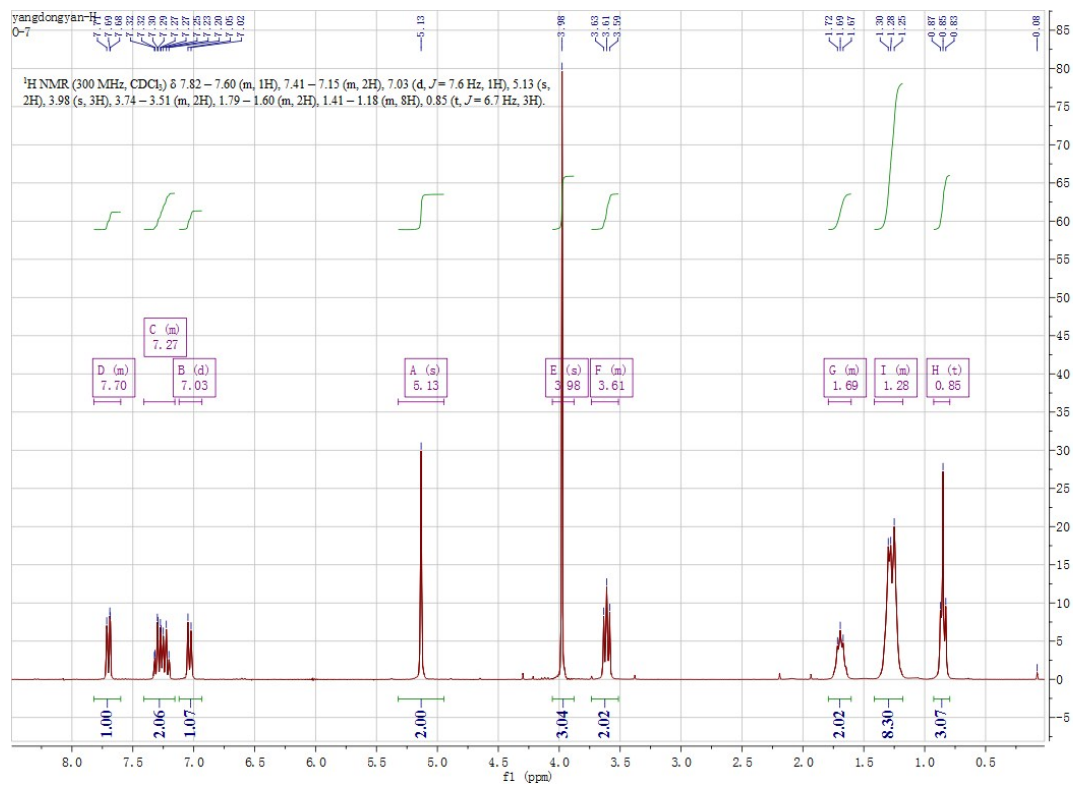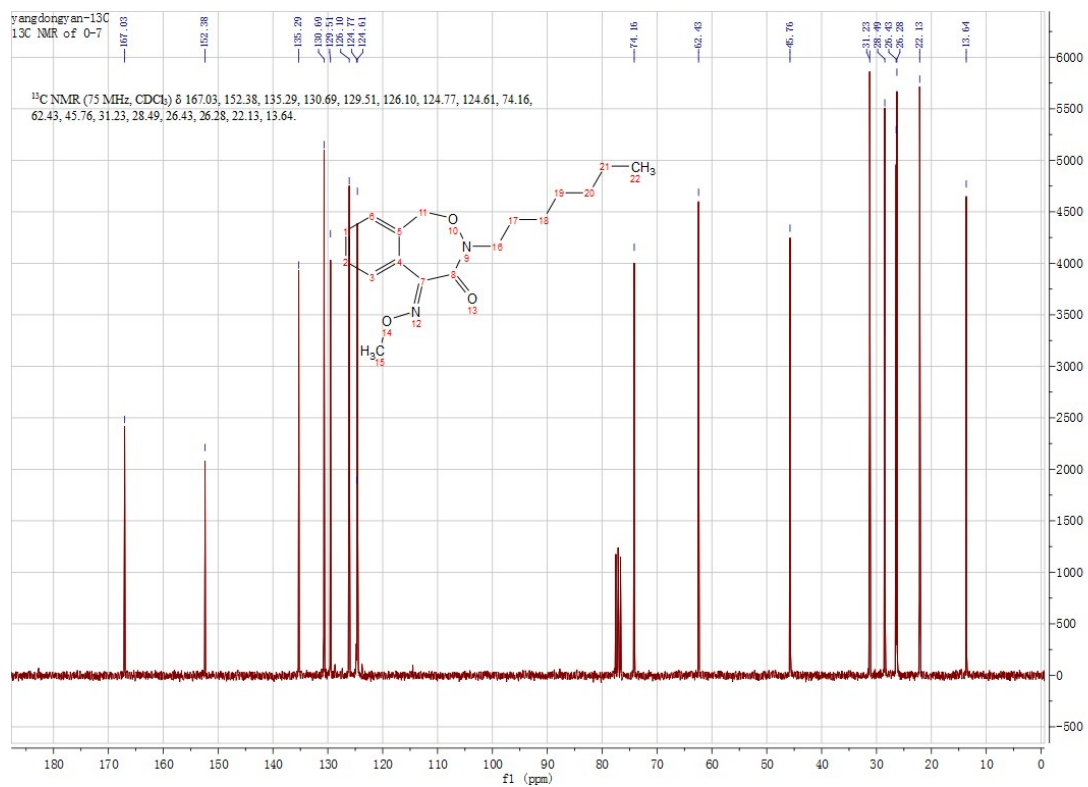

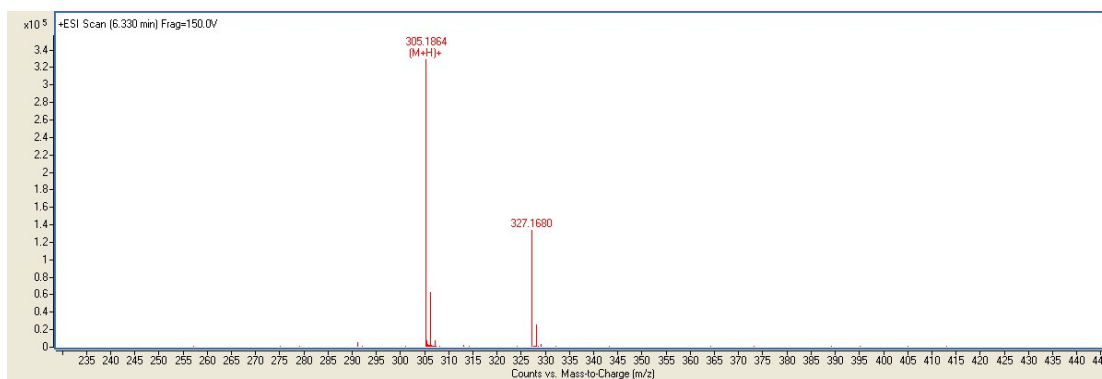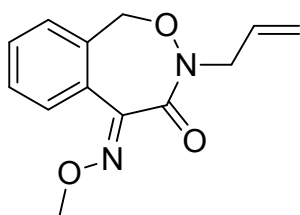

Data for (E)-3-allyl-5-(methoxyimino)-3,5-dihydrobenzo[e][1,2]oxazepin-4(1H)-one (**5-06**): yield 34 %; white solid; mp 62-63 °C; <sup>1</sup>H NMR (300 MHz, CDCl<sub>3</sub>) δ 7.79 (d, *J* = 7.6 Hz, 1H), 7.38 (dq, *J* = 14.2, 6.4 Hz, 2H), 7.13 (d, *J* = 7.5 Hz, 1H), 5.96 (ddt, *J* = 16.5, 10.1, 6.3 Hz, 1H), 5.38 (ddd, *J* = 13.6, 11.1, 1.1 Hz, 2H), 5.24 (s, 2H), 4.34 (d, *J* = 6.2 Hz, 2H), 4.09 (s, 3H). <sup>13</sup>C NMR (75 MHz, CDCl<sub>3</sub>) δ 167.35, 152.22, 135.36, 130.80, 130.63, 129.66, 126.22, 124.75, 124.69, 119.43, 74.79, 62.65, 48.80. HRMS (ESI) *m/z* calcd for C<sub>13</sub>H<sub>14</sub>N<sub>2</sub>O<sub>3</sub> (M+H)<sup>+</sup> 247.1077, found 247.1078.

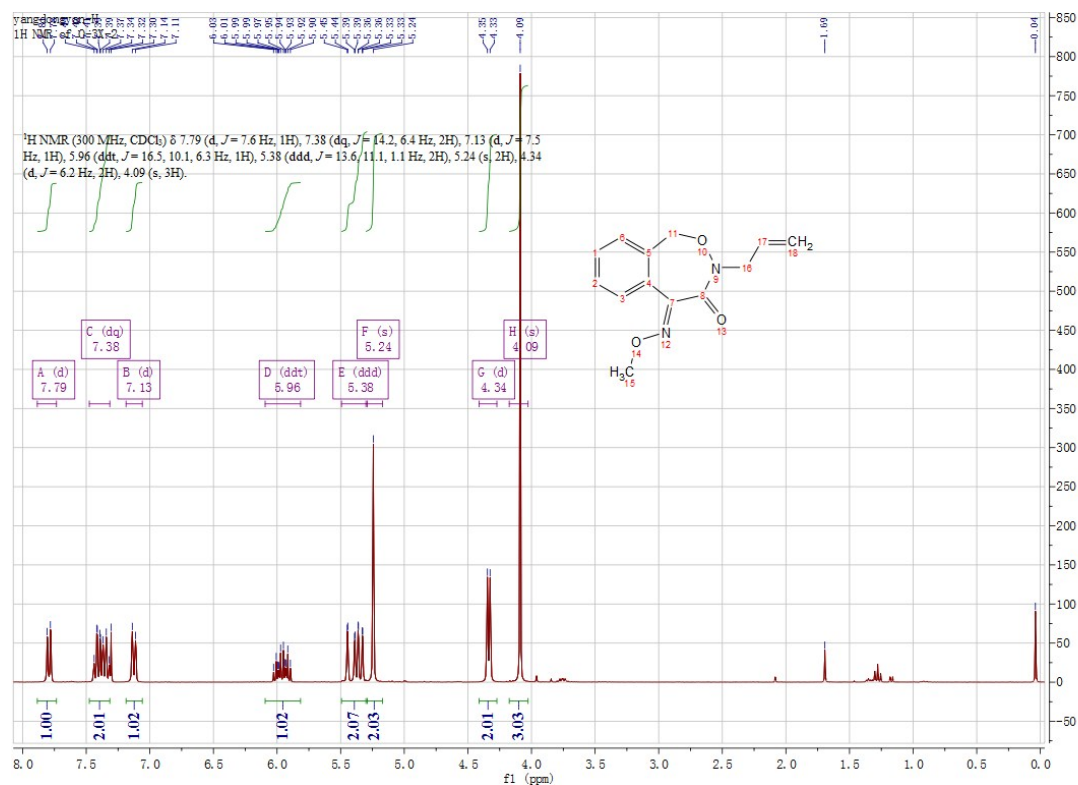

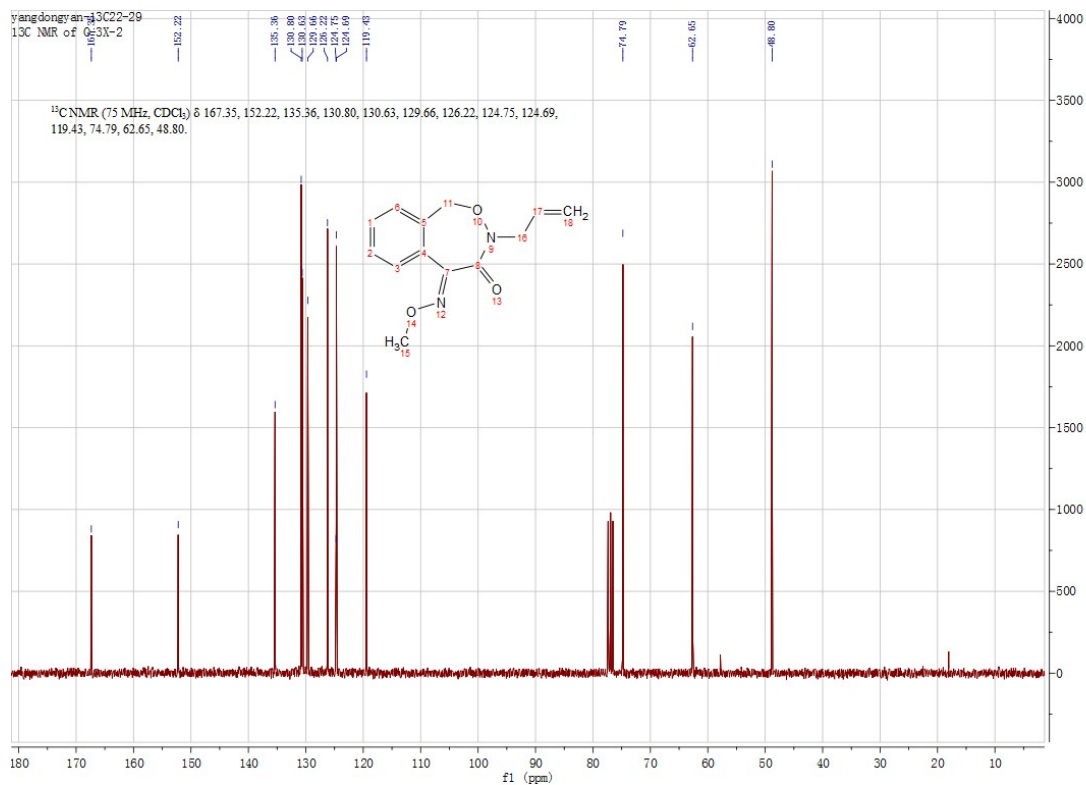

11 #62 RT: 0.67 AV: 1 NL: 8.03E9  
 T: FTMS + p ESI Full ms [150.00-1500.00]

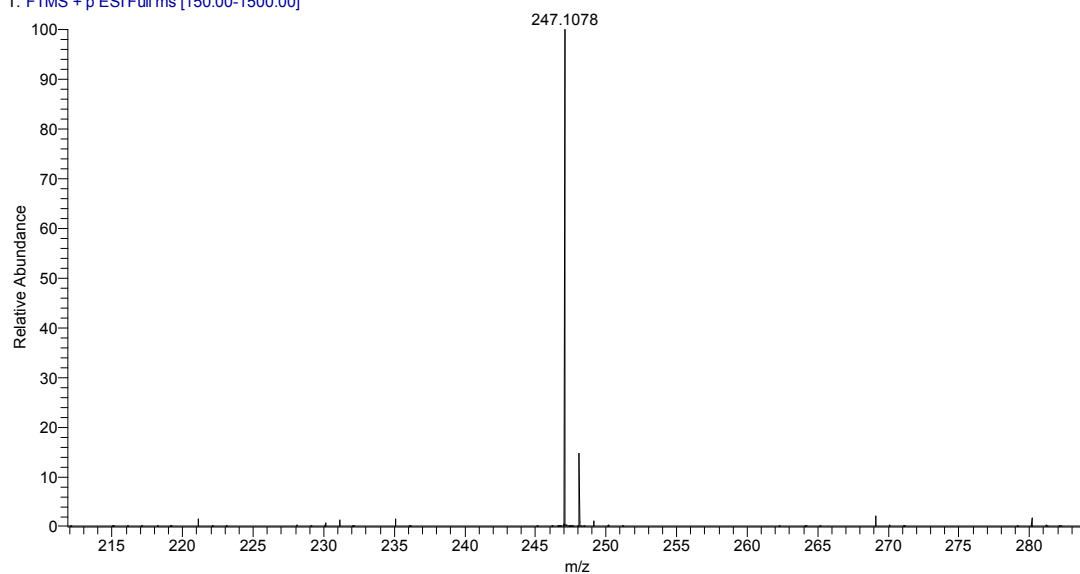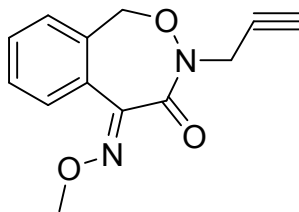

Data for (E)-5-(methoxyimino)-3-(prop-2-yn-1-yl)-3,5-dihydrobenzo[e][1,2]oxazepin-4(1H)-one (5-07): yield 52.5 %; yellowish solid; mp 82-83 °C; <sup>1</sup>H NMR (300 MHz, CDCl<sub>3</sub>) δ 8.67 – 8.55 (m,

1H), 7.96 (s, 1H), 7.55 – 7.34 (m, 2H), 7.22 (d,  $J = 6.8$  Hz, 1H), 5.26 (d,  $J = 15.0$  Hz, 1H), 5.06 (d,  $J = 15.0$  Hz, 1H), 4.77 (dd,  $J = 61.2, 2.6$  Hz, 2H), 4.08 (d,  $J = 12.2$  Hz, 3H).  $^{13}\text{C}$  NMR (75 MHz,  $\text{CDCl}_3$ )  $\delta$  159.64, 157.22, 143.08, 135.42, 131.15, 129.91, 126.97, 124.23, 123.79, 123.01, 89.08, 65.23, 62.98. HRMS (ESI)  $m/z$  calcd for  $\text{C}_{13}\text{H}_{12}\text{N}_2\text{O}_3$  (M+H) $^+$  245.0921, found 245.0921.

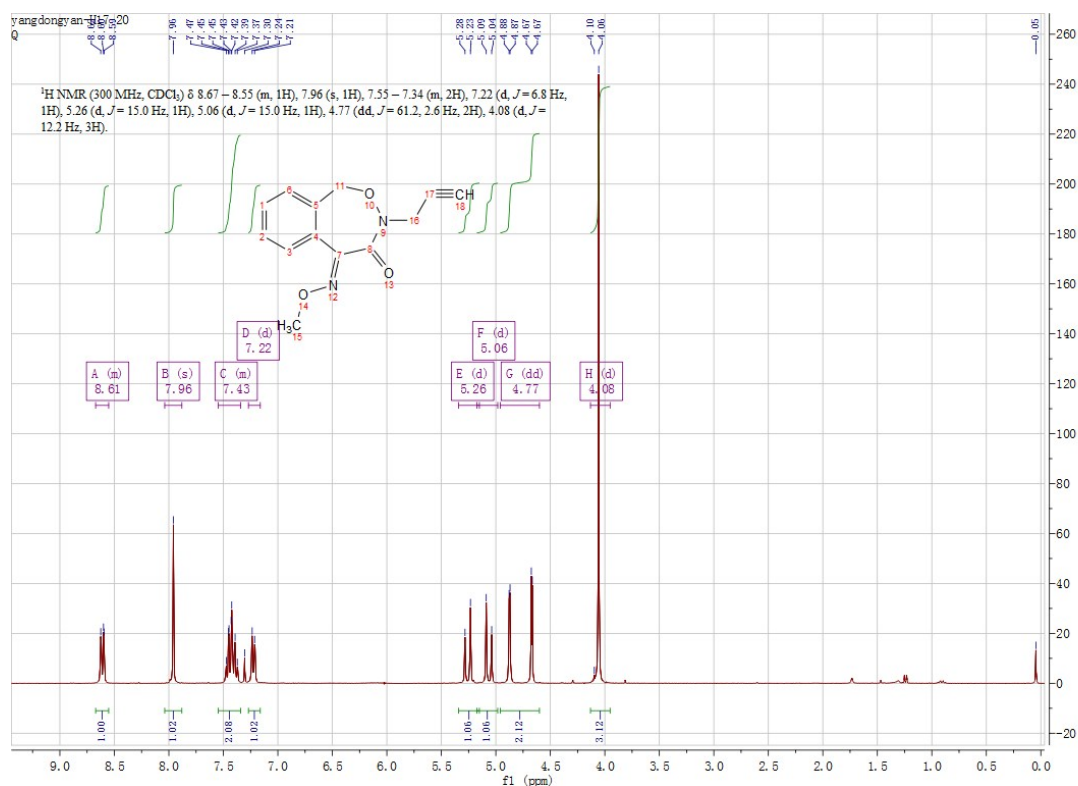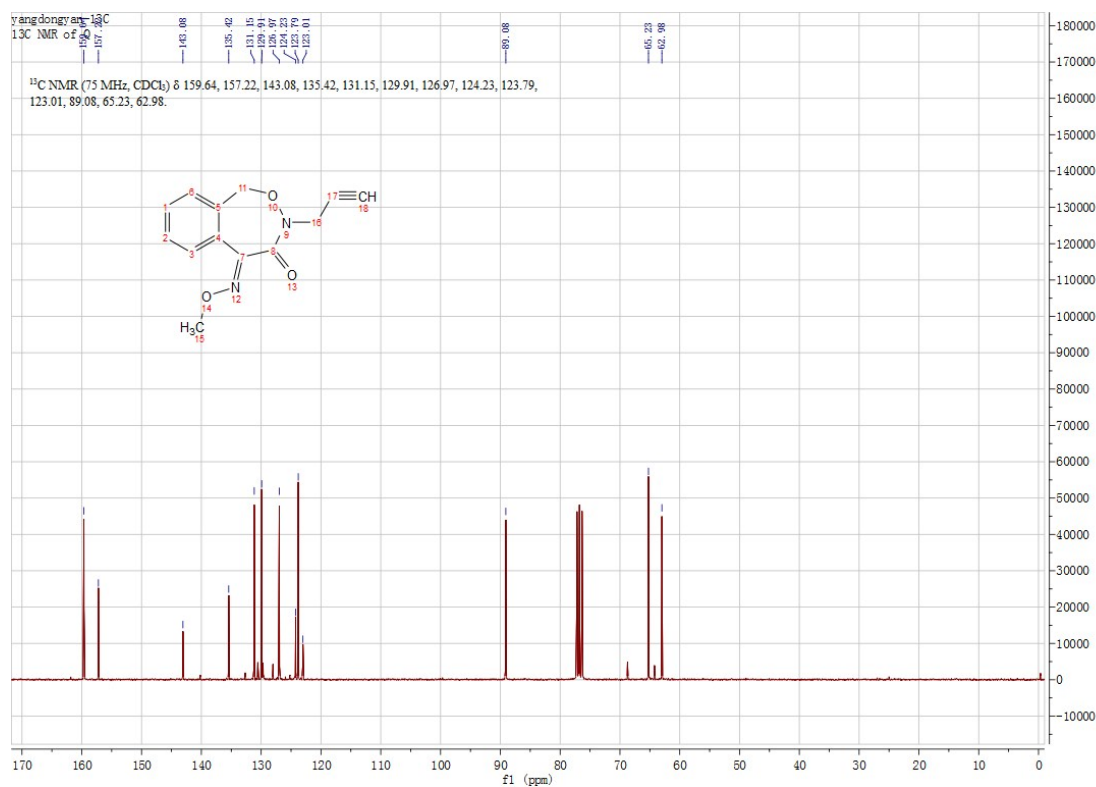

4 #72 RT: 0.76 AV: 1 NL: 2.59E9  
T: FTMS + p ESI Full ms [150.00-1500.00]

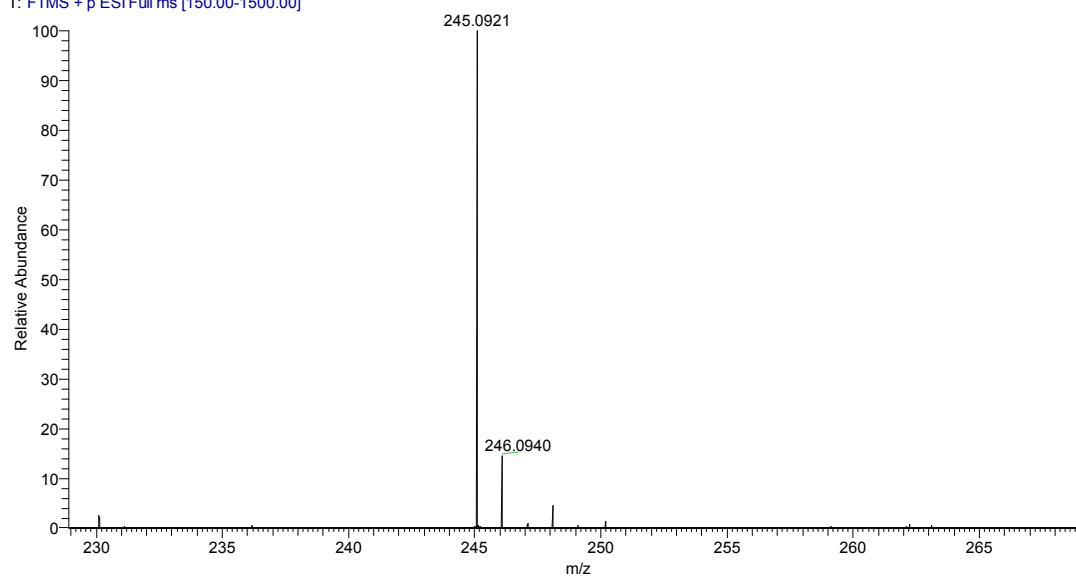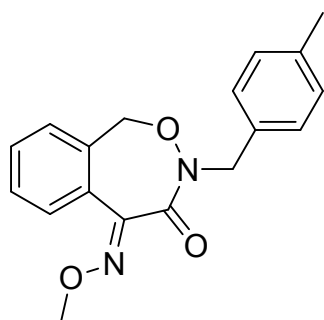

Data for (E)-5-(methoxyimino)-3-(4-methylbenzyl)-3,5-dihydrobenzo[e][1,2]oxazepin-4(1H)-one (**5-08**): yield 50.9 %; white solid; mp 72-74 °C;  $^1\text{H}$  NMR (300 MHz,  $\text{CDCl}_3$ )  $\delta$  7.90 – 7.70 (m, 1H), 7.42 – 7.31 (m, 4H), 7.21 (d,  $J = 7.9$  Hz, 2H), 7.01 (d,  $J = 7.1$  Hz, 1H), 4.98 (s, 2H), 4.84 (s, 2H), 4.09 (s, 3H), 2.40 (s, 3H).  $^{13}\text{C}$  NMR (75 MHz,  $\text{CDCl}_3$ )  $\delta$  167.47, 152.28, 137.54, 135.42, 131.63, 130.89, 129.56, 129.07, 128.65, 126.20, 124.82, 124.57, 74.80, 62.70, 49.64, 20.84. HRMS (ESI)  $m/z$  calcd for  $\text{C}_{18}\text{H}_{18}\text{N}_2\text{O}_3$  ( $\text{M}+\text{H}$ ) $^+$  311.1390, found 311.1390.

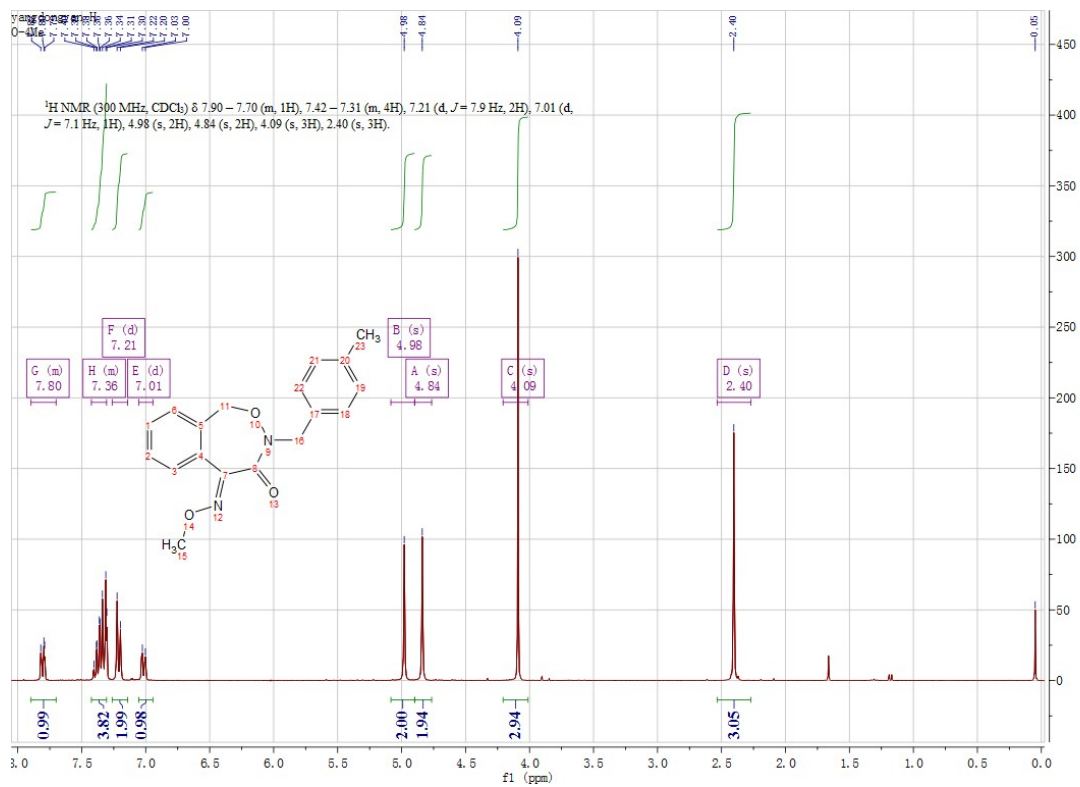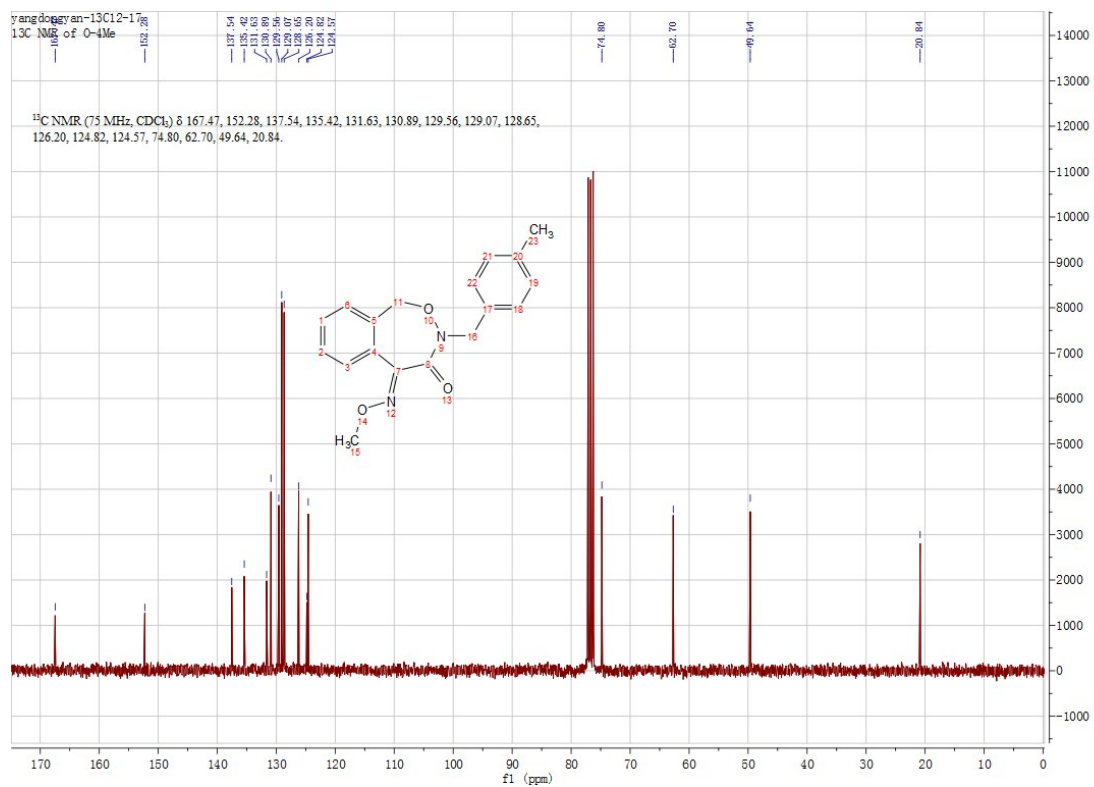



7 #74 RT: 0.78 AV: 1 NL: 1.10E10  
T: FTMS + p ESI Full ms [150.00-1500.00]

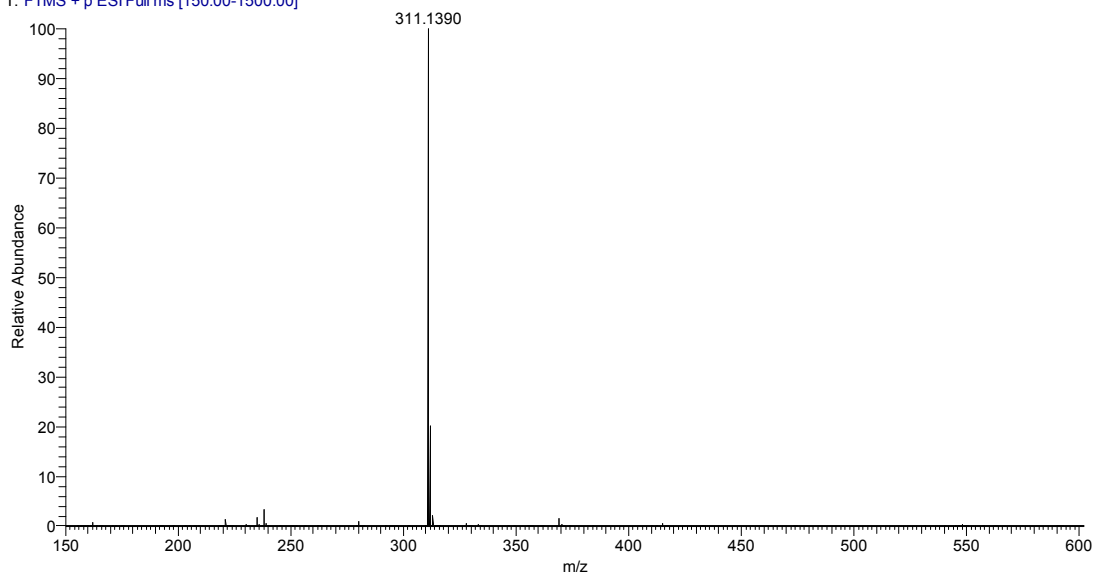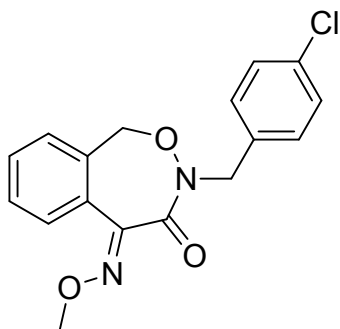

Data for (E)-3-(4-chlorobenzyl)-5-(methoxyimino)-3,5-dihydrobenzo[e][1,2]oxazepin-4(1H)-one (**5-09**): yield 75 %; white solid; mp 93-94 °C;  $^1\text{H}$  NMR (300 MHz,  $\text{CDCl}_3$ )  $\delta$  7.84 – 7.64 (m, 1H), 7.37 – 7.25 (m, 6H), 6.98 (d,  $J$  = 6.4 Hz, 1H), 4.95 (s, 2H), 4.77 (s, 2H), 4.03 (s, 3H).  $^{13}\text{C}$  NMR (75 MHz,  $\text{CDCl}_3$ )  $\delta$  167.66, 152.02, 135.14, 133.78, 133.24, 130.92, 130.03, 129.68, 128.60, 126.31, 124.72, 124.60, 74.83, 62.76, 49.27. HRMS (ESI)  $m/z$  calcd for  $\text{C}_{17}\text{H}_{15}\text{ClN}_2\text{O}_3$  ( $\text{M}+\text{H}$ ) $^+$  331.0844, found 331.0847.

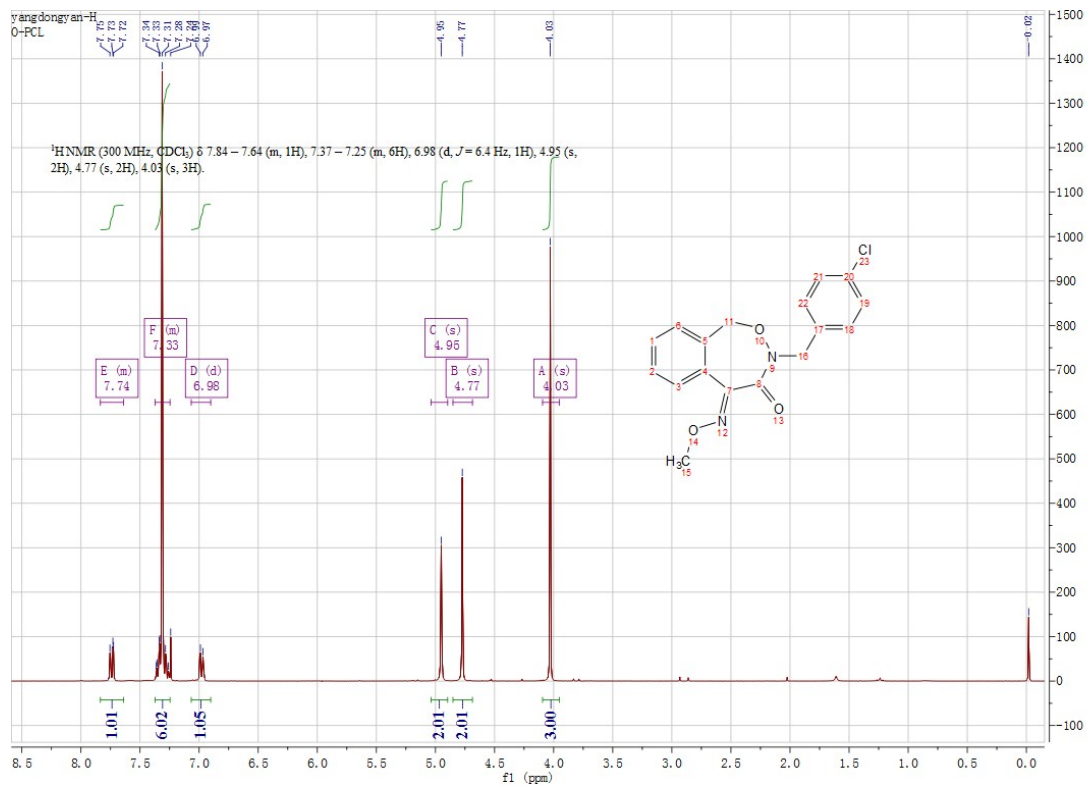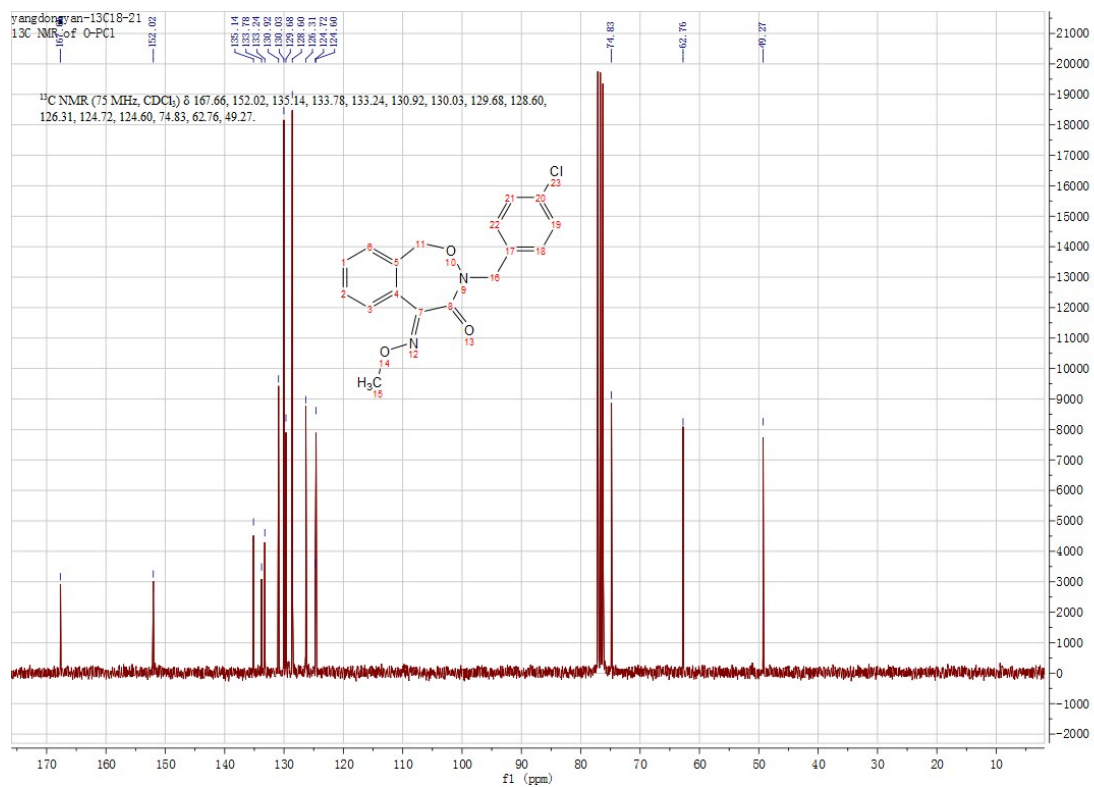

8 #276 RT: 2.97 AV: 1 NL: 3.45E9  
T: FTMS + p ESI Full ms [150.00-1500.00]

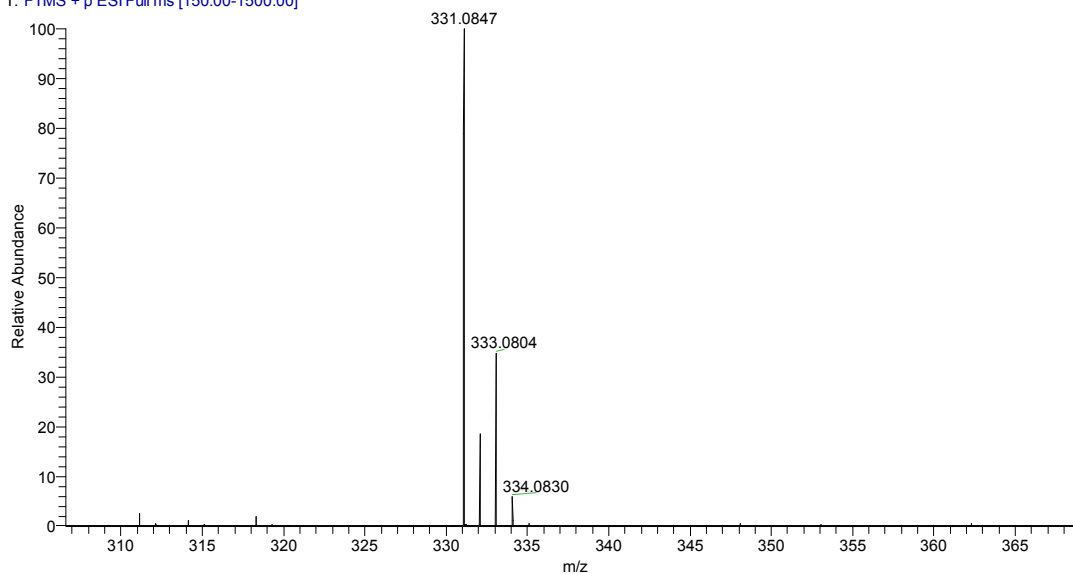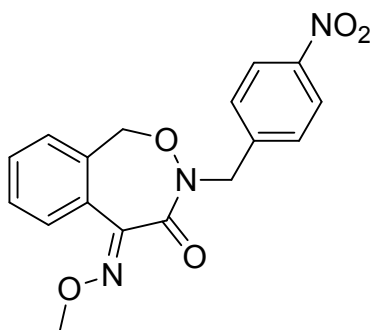

Data for (E)-5-(methoxyimino)-3-(4-nitrobenzyl)-3,5-dihydrobenzo[e][1,2]oxazepin-4(1H)-one (**5-10**): yield 56 %; yellowish solid; mp 92-93 °C;  $^1\text{H}$  NMR (300 MHz, DMSO)  $\delta$  8.39 – 8.20 (m, 2H), 7.66 (dd,  $J$  = 12.7, 4.9 Hz, 3H), 7.49 (td,  $J$  = 7.6, 1.4 Hz, 1H), 7.38 (t,  $J$  = 6.9 Hz, 1H), 7.27 (d,  $J$  = 7.8 Hz, 1H), 5.33 (s, 2H), 5.06 (s, 2H), 3.95 (s, 3H).  $^{13}\text{C}$  NMR (75 MHz, DMSO)  $\delta$  166.11, 152.38, 147.24, 143.36, 135.97, 130.49, 130.28, 129.47, 126.65, 125.86, 124.37, 123.92, 74.00, 62.68, 48.10. HRMS (ESI)  $m/z$  calcd for  $\text{C}_{17}\text{H}_{15}\text{N}_3\text{O}_5$  ( $\text{M}+\text{H}$ ) $^+$  342.1086, found 342.1084.

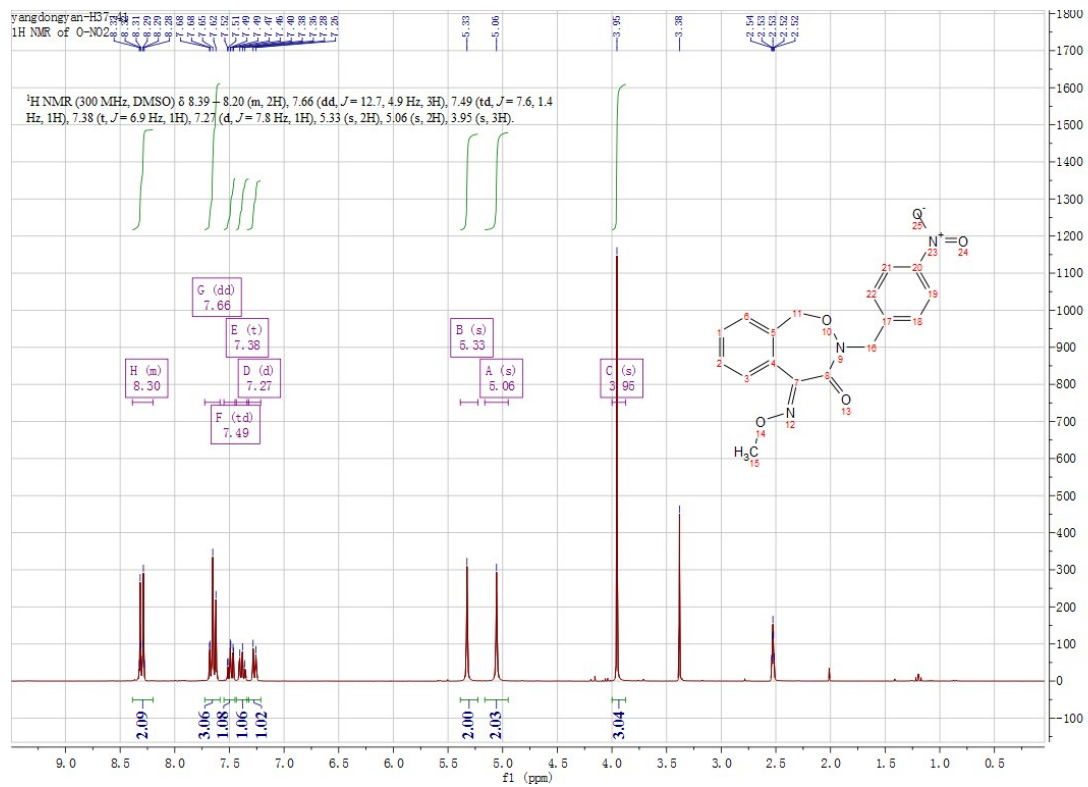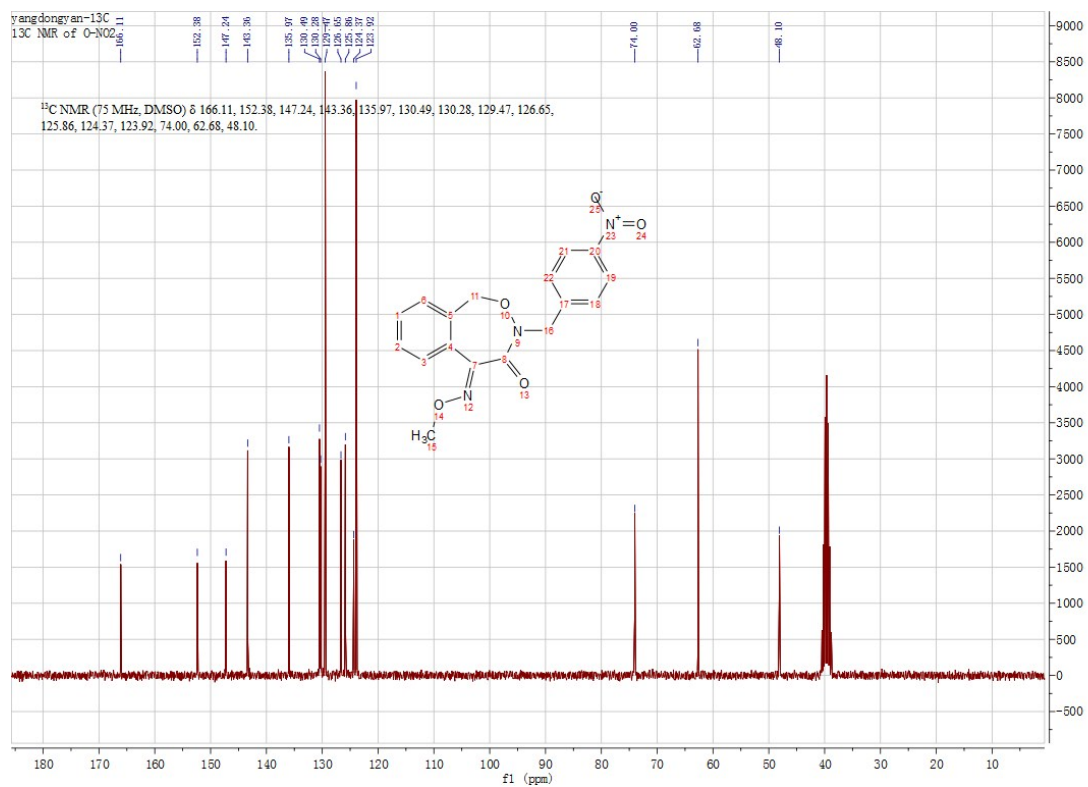

10 #68 RT: 0.72 AV: 1 NL: 6.14E8  
T: FTMS + p ESI Full ms [150.00-1500.00]

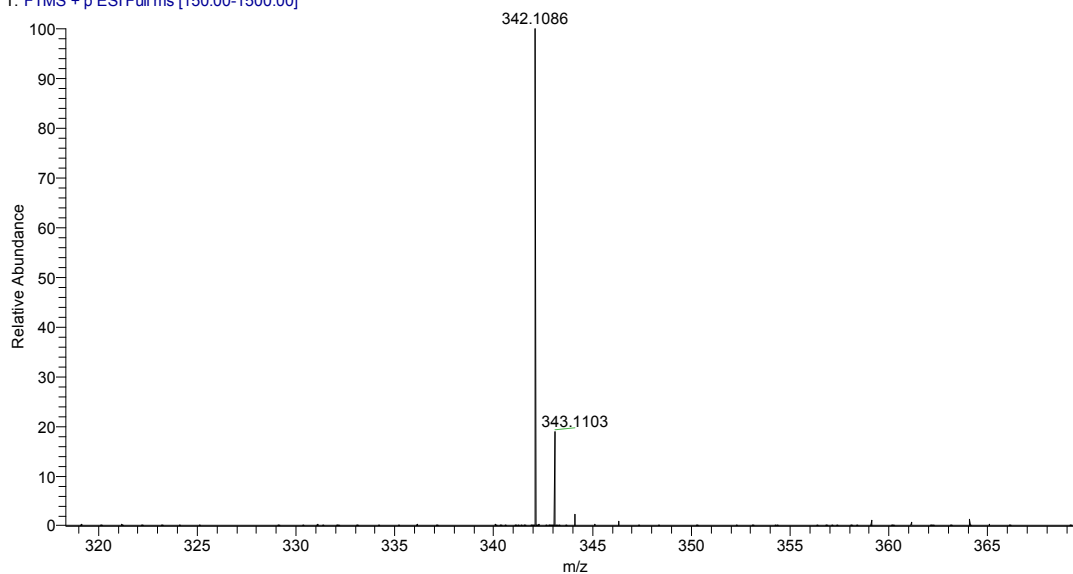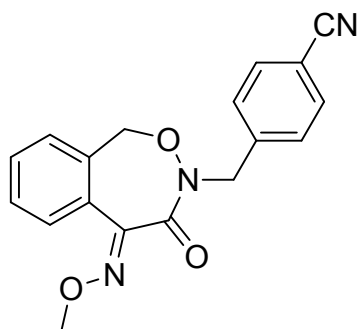

Data for (E)-4-((5-(methoxyimino)-4-oxo-4,5-dihydrobenzo[e][1,2]oxazepin-3(1H)-yl)methyl)benzonitrile (**5-11**). Yellowish oil; yield, 26%.  $^1\text{H}$  NMR (300 MHz,  $\text{CDCl}_3$ )  $\delta$  7.89 – 7.75 (m, 1H), 7.70 (d,  $J$  = 8.4 Hz, 2H), 7.54 (d,  $J$  = 8.4 Hz, 2H), 7.46 – 7.33 (m, 2H), 7.07 (d,  $J$  = 6.6 Hz, 1H), 5.08 (s, 2H), 4.92 (s, 2H), 4.09 (s, 3H).  $^{13}\text{C}$  NMR (75 MHz,  $\text{CDCl}_3$ )  $\delta$  167.80, 151.71, 140.07, 134.84, 132.22, 130.96, 129.80, 129.05, 126.46, 124.63, 124.60, 118.14, 111.79, 74.73, 62.84, 49.48. HRMS (ESI)  $m/z$  calcd for  $\text{C}_{18}\text{H}_{16}\text{N}_3\text{O}_3$  ( $\text{M}+\text{H}$ ) $^+$  322.1186, found 322.1185.

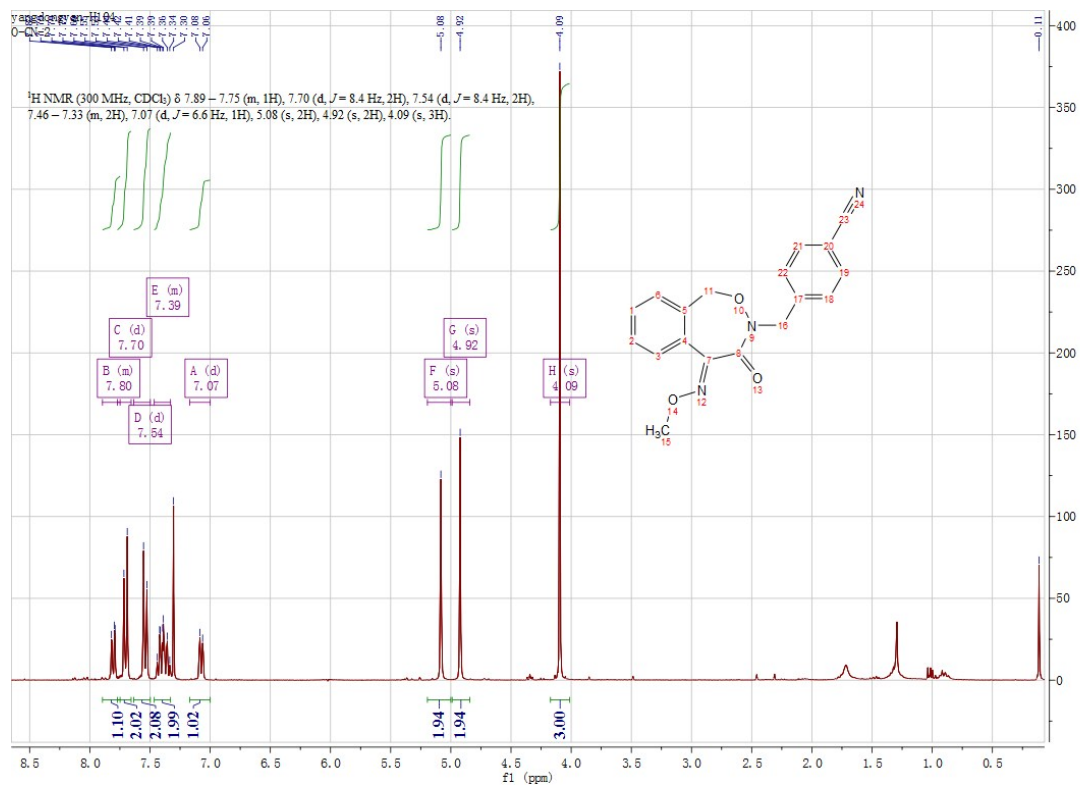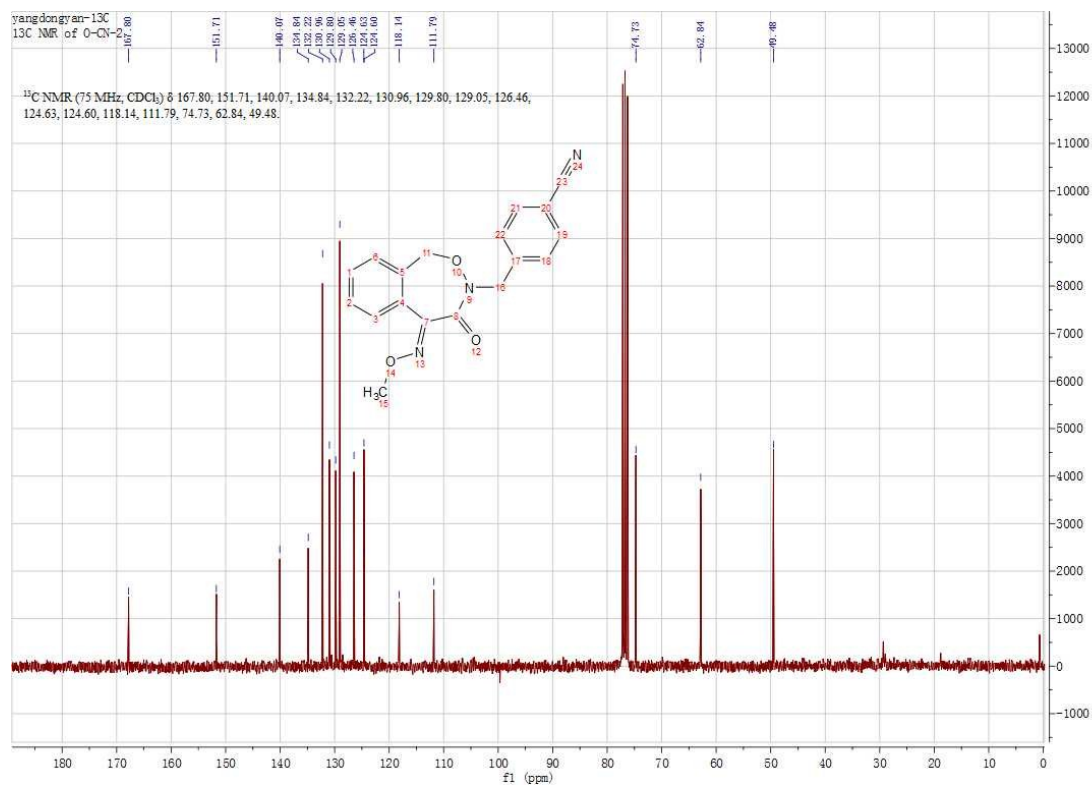

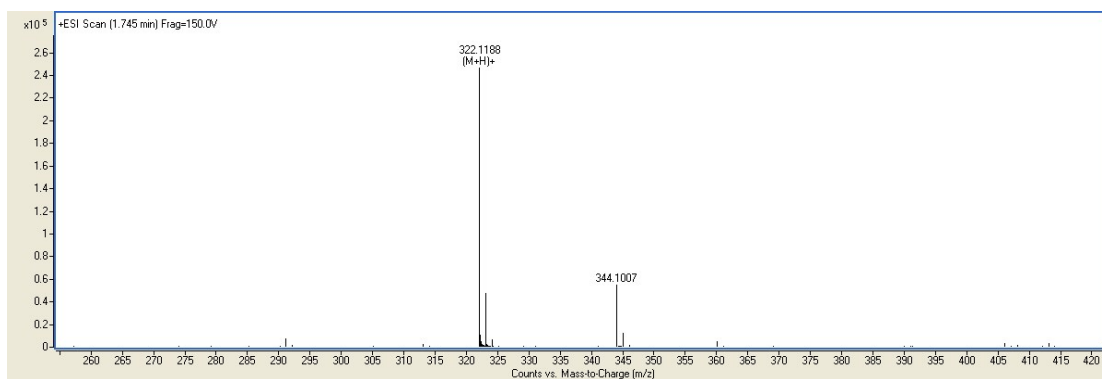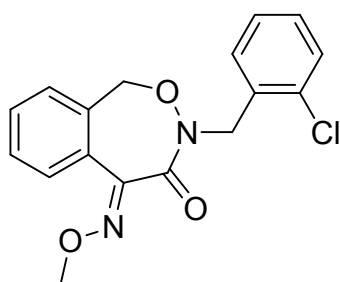

Data for (E)-3-(2-chlorobenzyl)-5-(methoxyimino)-3,5-dihydrobenzo[e][1,2]oxazepin-4(1H)-one (**5-12**): yield 24 %; white solid; mp 69-70°C. <sup>1</sup>H NMR (300 MHz, CDCl<sub>3</sub>) δ 7.90 (d, *J* = 8.0 Hz, 1H), 7.60 – 7.50 (m, 1H), 7.41 (dd, *J* = 8.1, 5.6 Hz, 2H), 7.32 (t, *J* = 6.4 Hz, 2H), 7.29 (s, 1H), 7.15 (d, *J* = 7.6 Hz, 1H), 5.38 (s, 2H), 5.23 (s, 2H), 4.09 (s, 3H). <sup>13</sup>C NMR (75 MHz, CDCl<sub>3</sub>) δ 171.17, 147.18, 137.83, 133.12, 132.63, 130.31, 129.92, 129.34, 129.23, 129.15, 126.49, 125.88, 125.07, 71.84, 67.44, 62.82. HRMS (ESI) *m/z* calcd for C<sub>17</sub>H<sub>15</sub>ClN<sub>2</sub>O<sub>3</sub> (M+H)<sup>+</sup> 331.0844, found 331.0843.

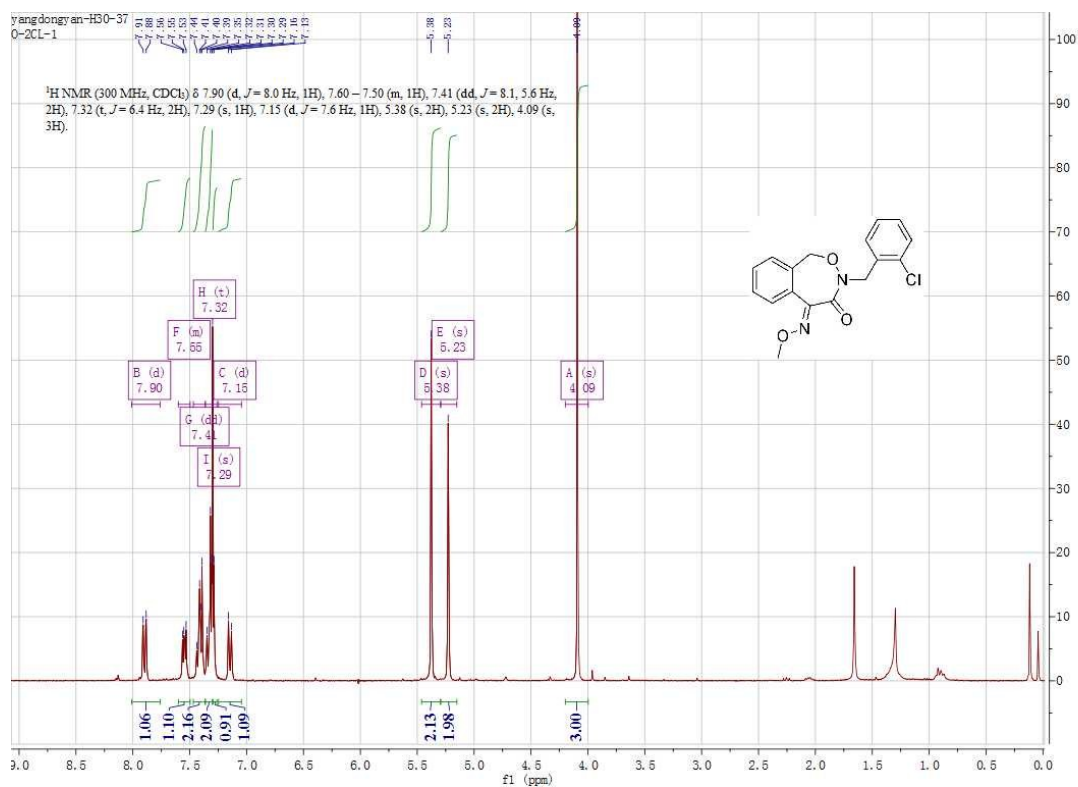

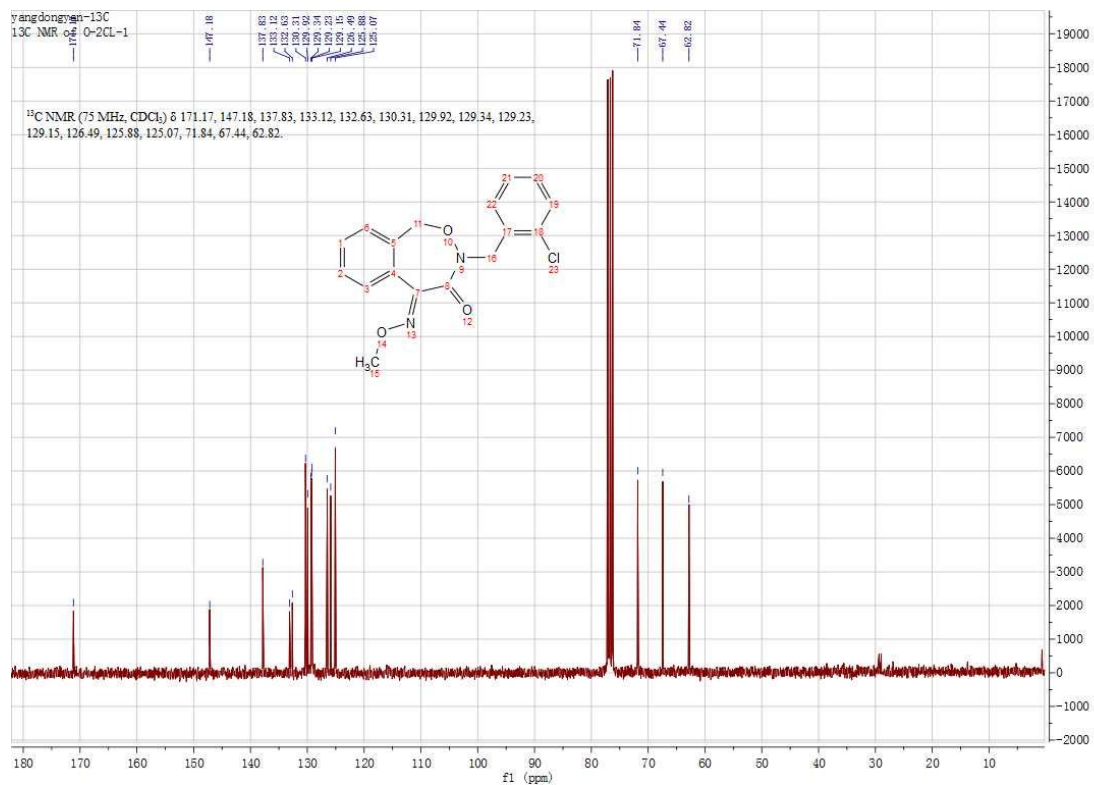

12\_160522125312 #72 RT: 0.76 AV: 1 NL: 1.91E8  
 T: FTMS + p ESI Full ms [150.00-1500.00]

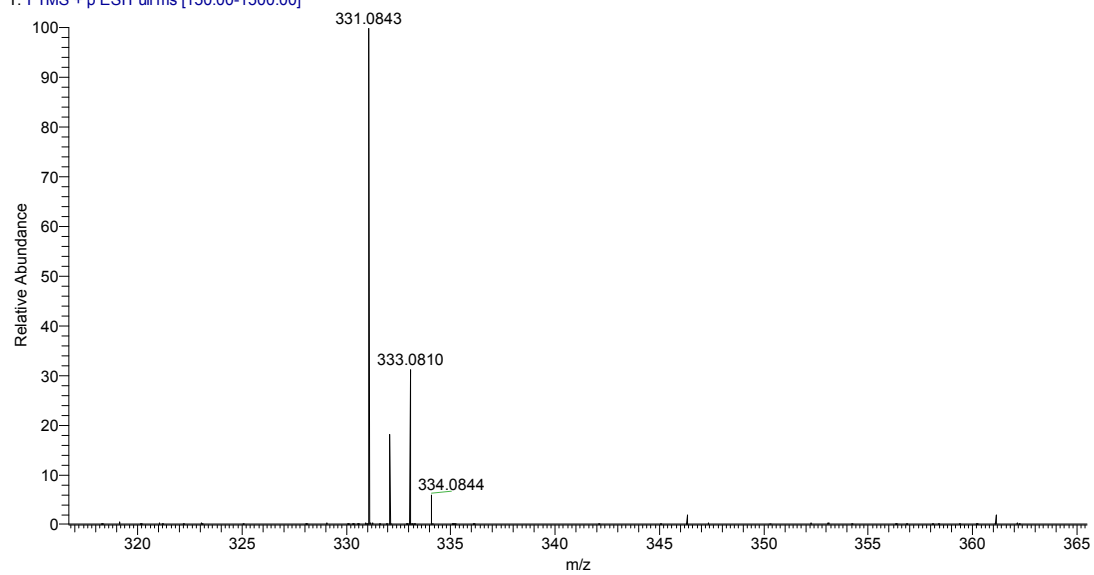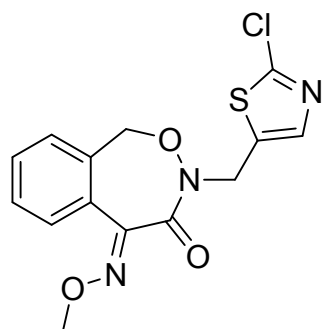

Data

for

(E)-3-((2-chlorothiazol-5-yl)methyl)-5-(methoxyimino)-3,5-



dihydrobenzo[e][1,2]oxazepin-4(1H)-one (**5-13**): yield 66 %; yellowish solid; mp 109-111 °C;  $^1\text{H}$  NMR (300 MHz,  $\text{CDCl}_3$ )  $\delta$  7.75 (d,  $J = 7.7$  Hz, 1H), 7.58 (s, 1H), 7.36 (dt,  $J = 20.5, 6.7$  Hz, 2H), 7.09 (d,  $J = 7.5$  Hz, 1H), 5.19 (s, 2H), 4.92 (s, 2H), 4.05 (s, 3H).  $^{13}\text{C}$  NMR (75 MHz,  $\text{CDCl}_3$ )  $\delta$  168.12, 152.45, 151.55, 141.23, 134.91, 133.22, 130.89, 129.82, 126.37, 124.73, 124.50, 75.08, 62.83, 42.28. HRMS (ESI)  $m/z$  calcd for  $\text{C}_{14}\text{H}_{12}\text{ClN}_3\text{O}_3\text{S}$  ( $\text{M}+\text{H}$ ) $^+$  338.0361, found 338.0367.

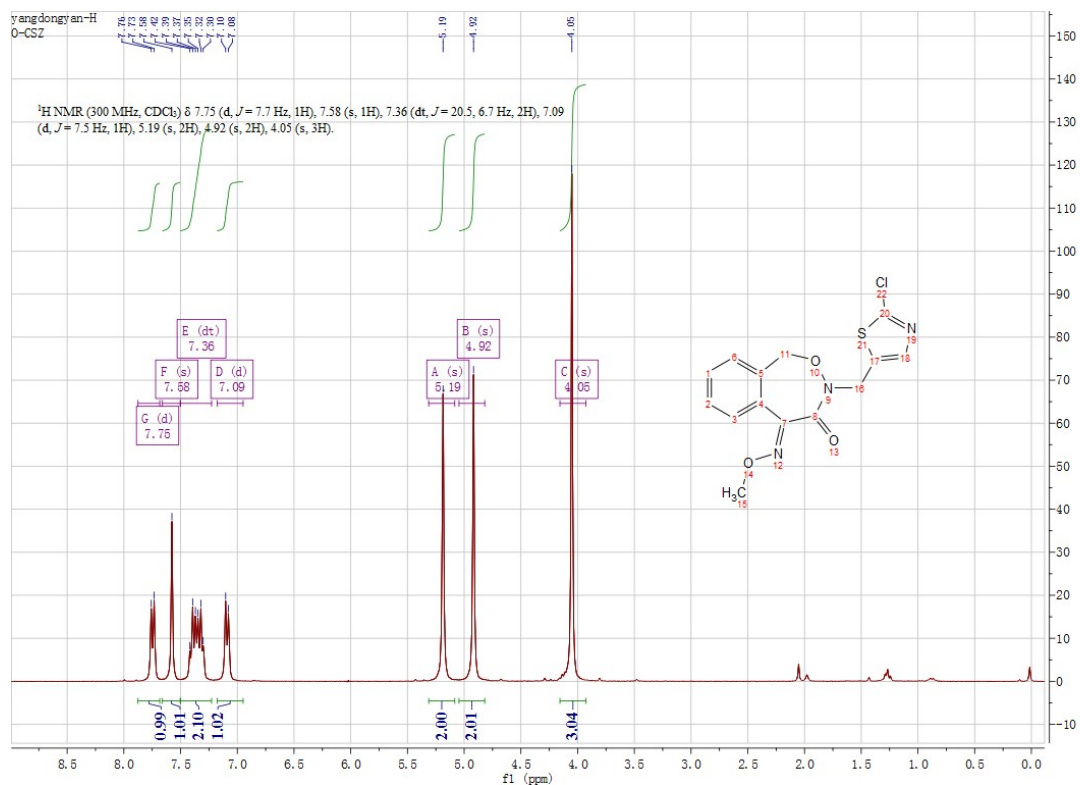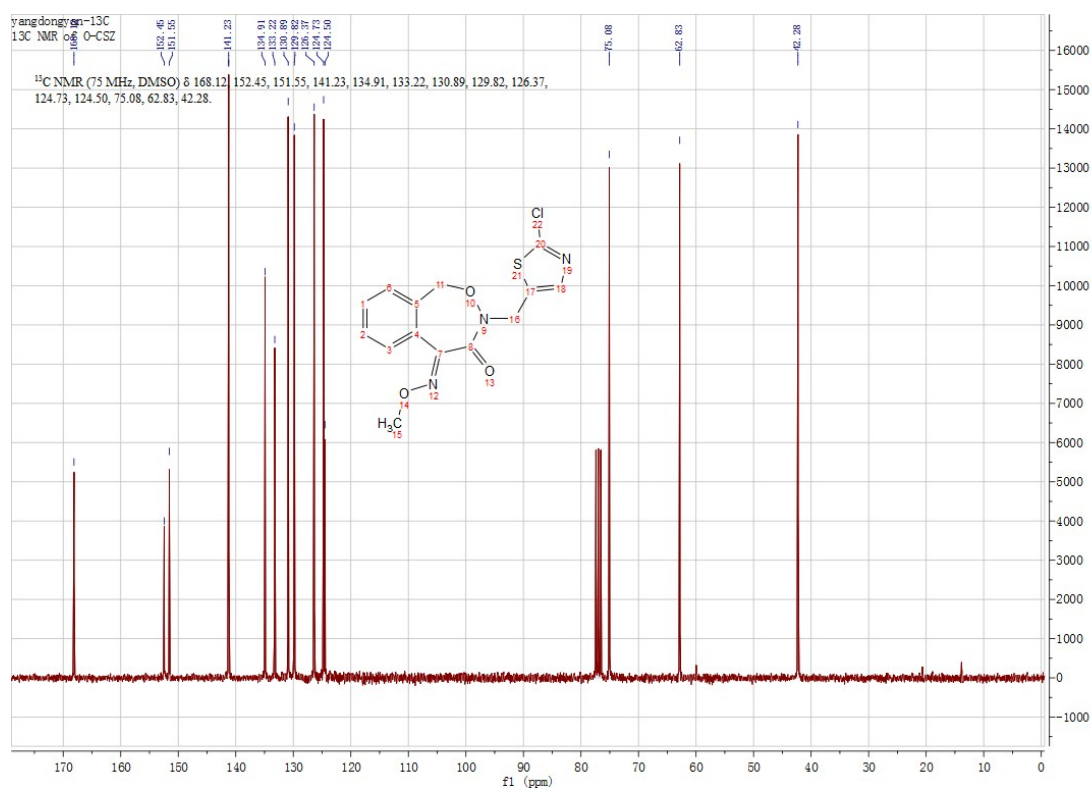

15 #76 RT: 0.80 AV: 1 NL: 1.40E9  
T: FTMS + p ESI Full ms [150.00-1500.00]

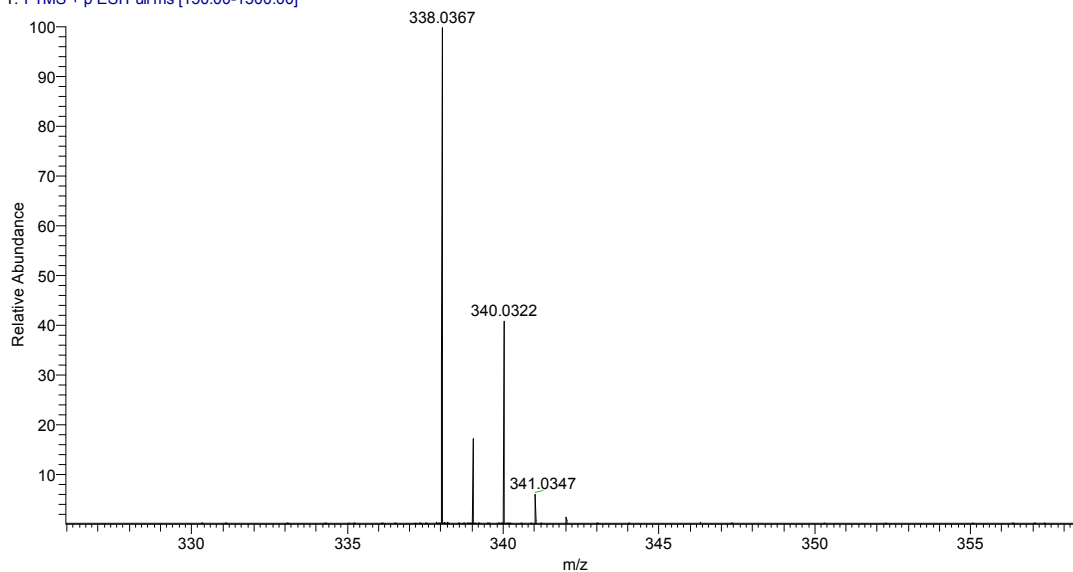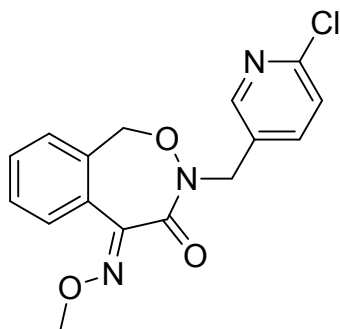

Data for (E)-3-((6-chloropyridin-3-yl)methyl)-5-(methoxyimino)-3,5-dihydrobenzo[e][1,2]oxazepin-4(1H)-one (**5-14**): yield 68 %; yellowish solid; mp 109-111 °C;  $^1\text{H}$  NMR (300 MHz,  $\text{CDCl}_3$ )  $\delta$  8.45 (d,  $J = 2.4$  Hz, 1H), 7.84 – 7.71 (m, 2H), 7.46 – 7.31 (m, 3H), 7.07 (d,  $J = 7.3$  Hz, 1H), 5.09 (s, 2H), 4.84 (s, 2H), 4.07 (s, 3H).  $^{13}\text{C}$  NMR (75 MHz,  $\text{CDCl}_3$ )  $\delta$  168.01, 151.67, 151.10, 149.71, 139.17, 134.82, 130.93, 129.79, 129.41, 126.43, 124.66, 124.56, 124.14, 74.84, 62.84, 46.73. HRMS (ESI)  $m/z$  calcd for  $\text{C}_{16}\text{H}_{15}\text{ClN}_3\text{O}_3$  ( $\text{M}+\text{H}$ ) $^+$  332.0796, found 332.0792.

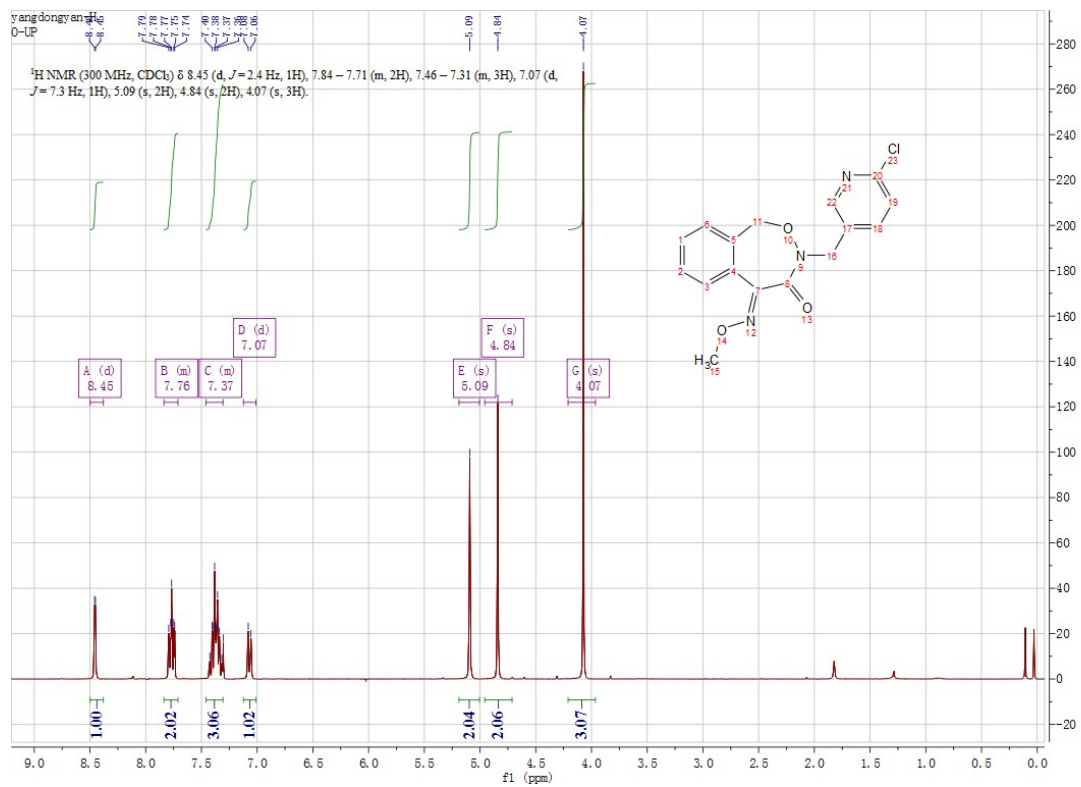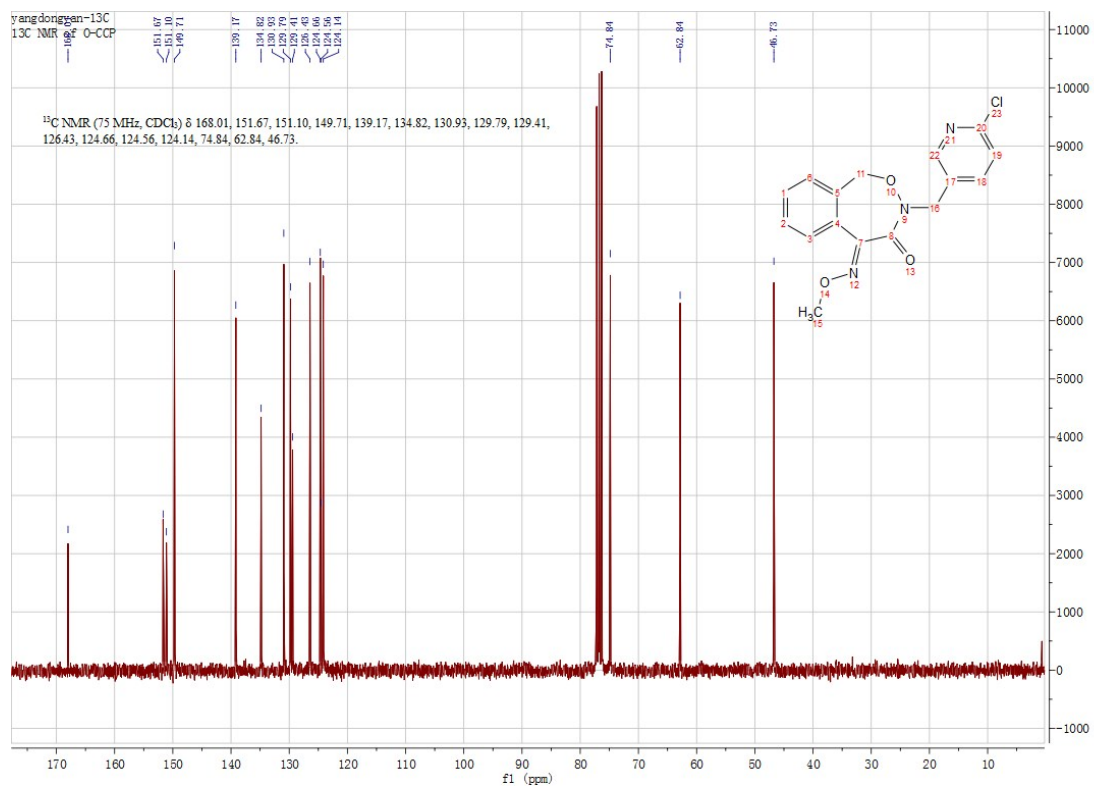

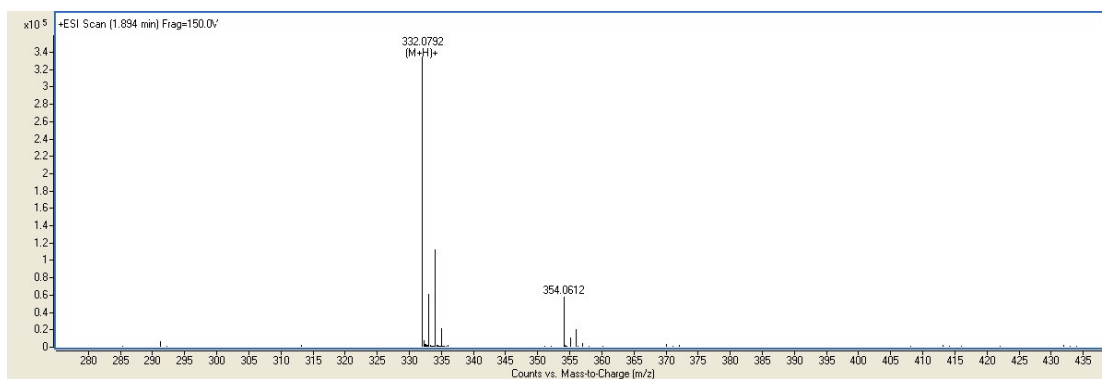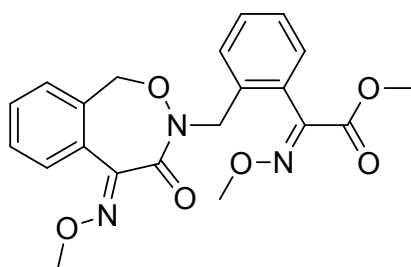

*Data for (E)-methyl 2-(methoxyimino)-2-(2-(((E)-5-(methoxyimino)-4-oxo-4,5-dihydrobenzo[e][1,2]oxazepin-3(1H)-yl)methyl)phenyl)acetate (5-15):* yield 63 %; white solid; mp 147 °C; <sup>1</sup>H NMR (300 MHz, CDCl<sub>3</sub>) δ 7.79 – 7.66 (m, 1H), 7.55 – 7.37 (m, 3H), 7.35 – 7.25 (m, 2H), 7.19 (dd, *J* = 5.4, 3.6 Hz, 1H), 6.94 (d, *J* = 7.7 Hz, 1H), 4.77 (s, 2H), 4.68 (s, 2H), 4.04 (s, 3H), 3.95 (s, 3H), 3.64 (s, 3H). <sup>13</sup>C NMR (75 MHz, CDCl<sub>3</sub>) δ 167.76, 162.98, 152.13, 148.36, 135.70, 133.15, 130.79, 130.49, 129.82, 129.47, 129.36, 128.45, 127.79, 126.03, 124.77, 124.62, 75.01, 63.46, 62.71, 52.48, 48.45. HRMS (ESI) *m/z* calcd for C<sub>21</sub>H<sub>21</sub>N<sub>3</sub>O<sub>6</sub> (M+H)<sup>+</sup> 412.1503, found 412.1503.

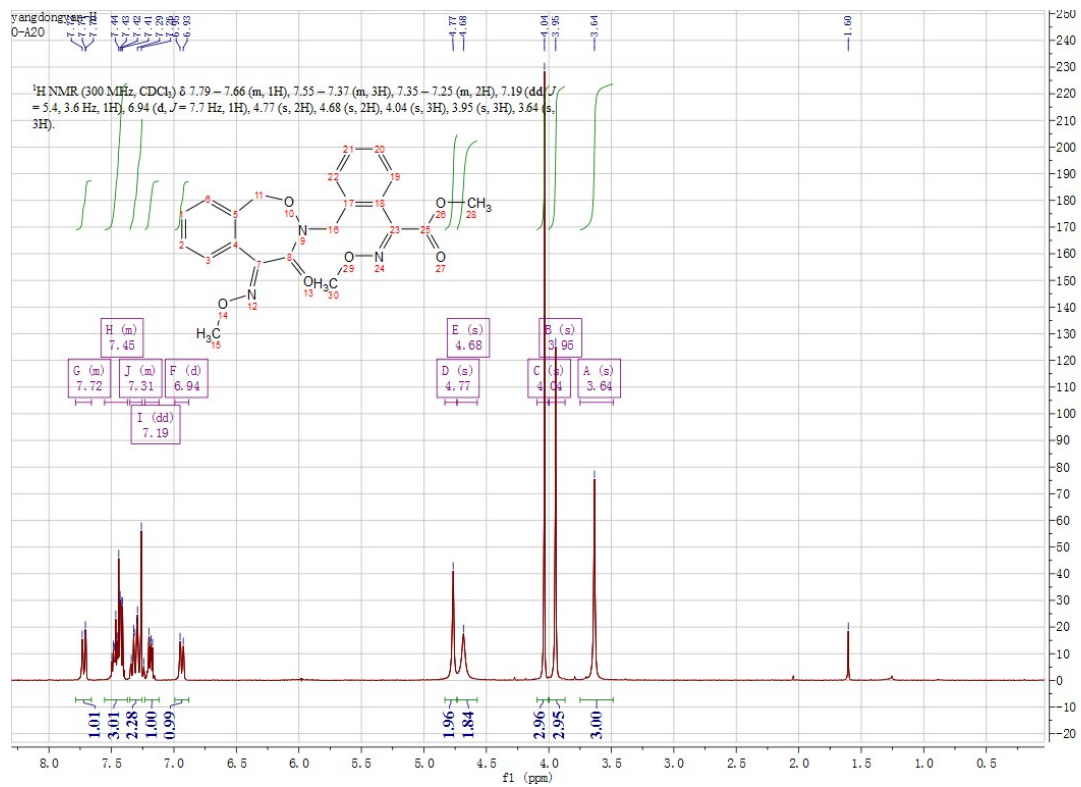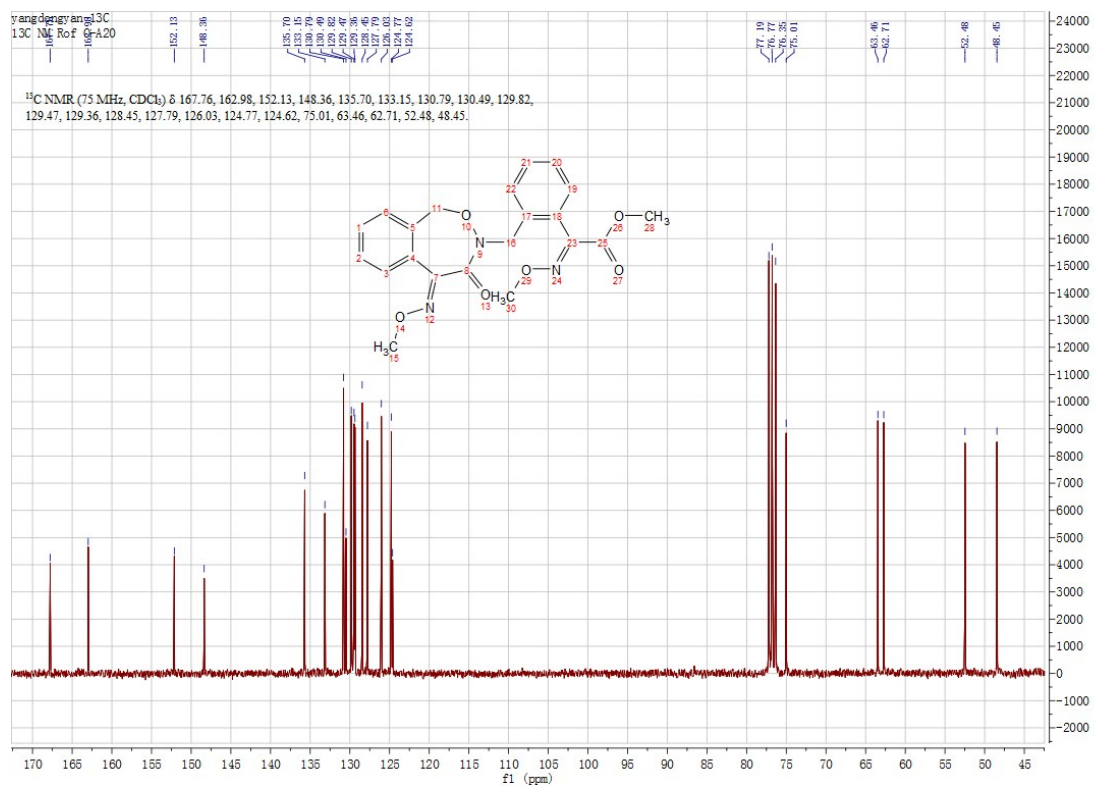

2\_160522114352 #68 RT: 0.72 AV: 1 NL: 6.17E9  
T: FTMS + p ESI Full ms [150.00-1500.00]

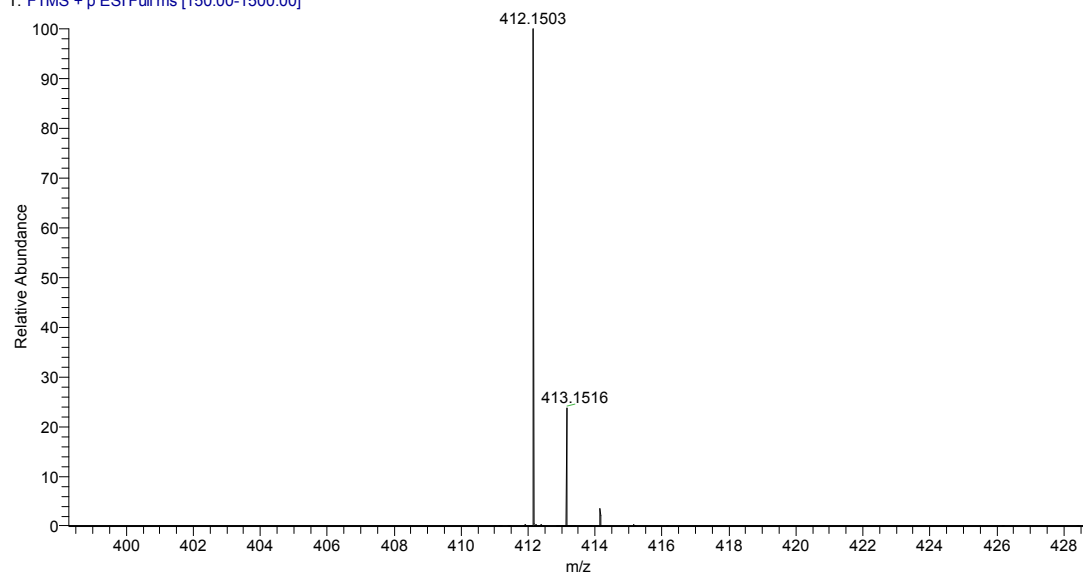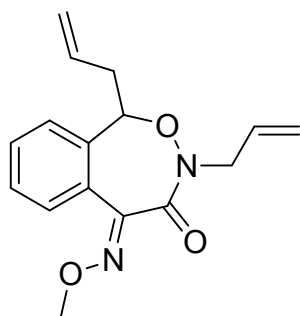

Data for (E)-1,3-diallyl-5-(methoxyimino)-3,5-dihydrobenzo[e][1,2]oxazepin-4(1H)-one (**5-16**): yield 42%; white solid; mp 52 °C;  $^1\text{H}$  NMR (300 MHz,  $\text{CDCl}_3$ )  $\delta$  7.61 (dd,  $J = 6.3, 2.8$  Hz, 1H), 7.35 (ddd,  $J = 3.9, 3.2, 1.1$  Hz, 2H), 7.22 – 7.06 (m, 1H), 6.13 (ddd,  $J = 17.2, 10.2, 7.0$  Hz, 1H), 5.96 – 5.66 (m, 1H), 5.54 – 5.36 (m, 2H), 5.36 – 5.17 (m, 2H), 5.11 (d,  $J = 7.0$  Hz, 1H), 5.00 (d,  $J = 14.9$  Hz, 1H), 4.82 (d,  $J = 14.9$  Hz, 1H), 4.61 (dd,  $J = 15.1, 4.7$  Hz, 1H), 3.96 (d,  $J = 1.0$  Hz, 3H), 3.44 (dd,  $J = 15.1, 8.2$  Hz, 1H).  $^{13}\text{C}$  NMR (75 MHz,  $\text{CDCl}_3$ )  $\delta$  162.86, 154.10, 136.19, 133.16, 131.77, 130.73, 129.02, 127.25, 125.41, 119.11, 119.06, 90.77, 69.03, 62.06, 46.37. HRMS (ESI)  $m/z$  calcd for  $\text{C}_{16}\text{H}_{18}\text{N}_2\text{O}_3$  ( $\text{M}+\text{H}$ ) $^+$  287.1390, found 287.1391.

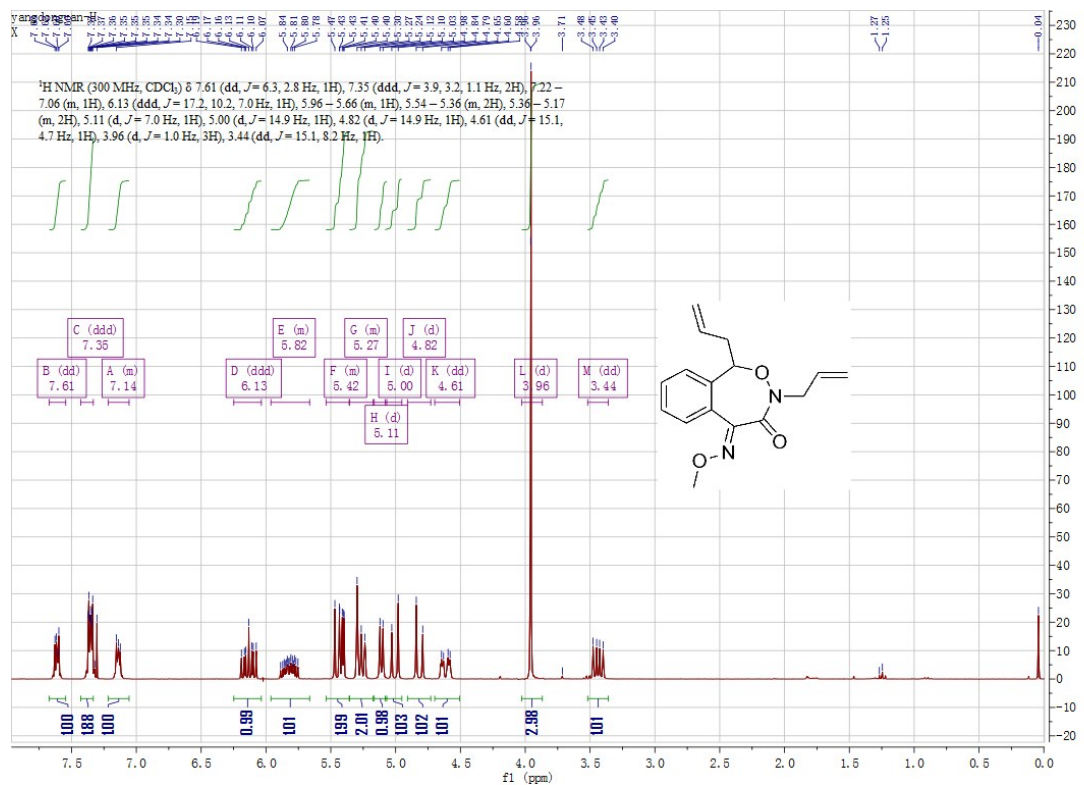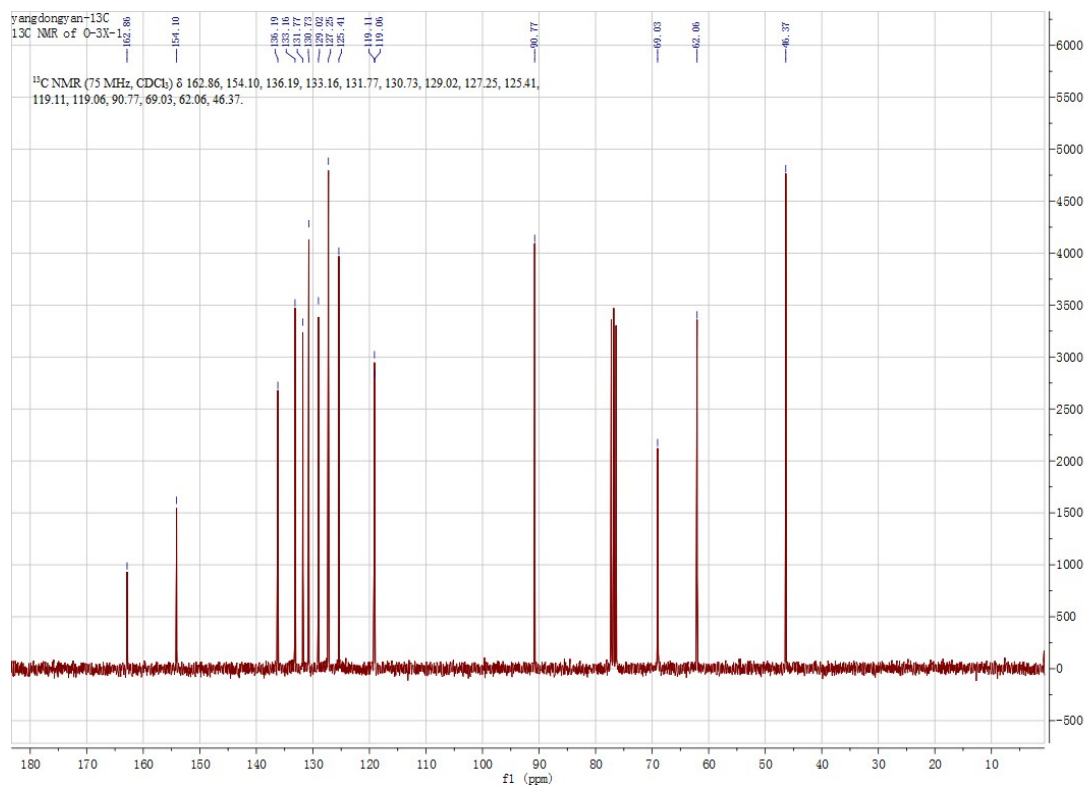

16 #66 RT: 0.70 AV: 1 NL: 1.04E10  
T: FTMS + p ESI Full ms [150.00-1500.00]

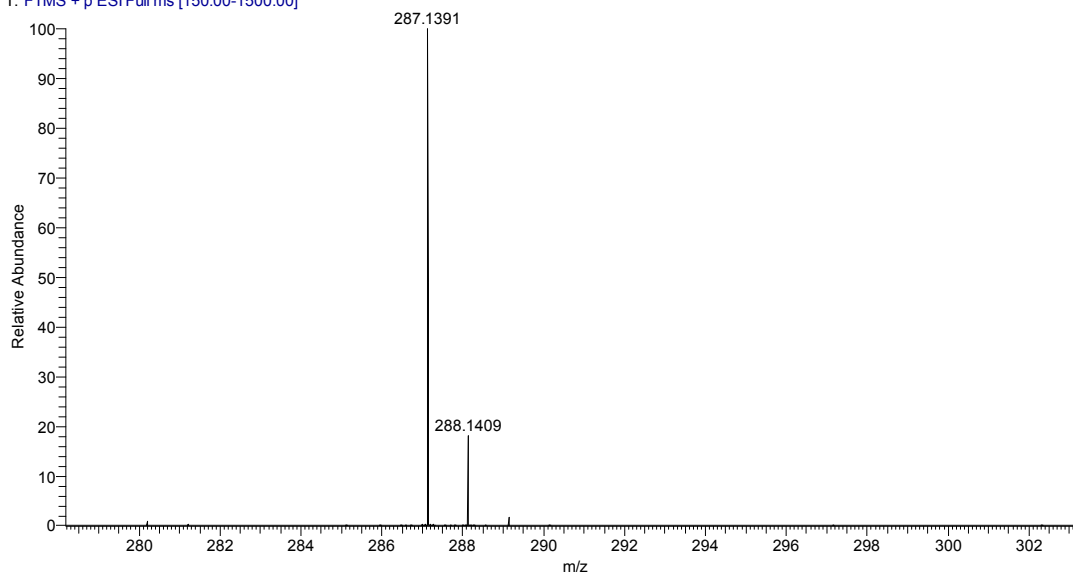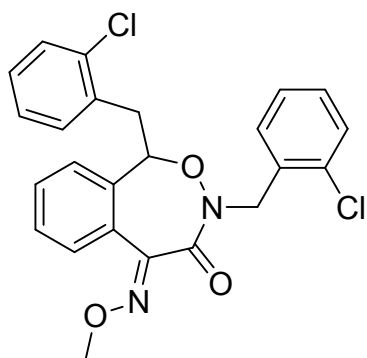

Data for (E)-1,3-bis(2-chlorobenzyl)-5-(methoxyimino)-3,5-dihydrobenzo[e][1,2]oxazepin-4(1H)-one (**5-17**): yield 54 %; white solid; mp 96-97 °C;  $^1\text{H}$  NMR (300 MHz,  $\text{CDCl}_3$ )  $\delta$  7.85 – 7.74 (m, 1H), 7.68 (dd,  $J = 5.8, 3.3$  Hz, 1H), 7.42 – 7.23 (m, 7H), 7.22 – 7.09 (m, 3H), 6.24 (s, 1H), 5.19 – 5.01 (m, 2H), 4.80 (d,  $J = 14.9$  Hz, 1H), 4.31 (d,  $J = 15.5$  Hz, 1H), 3.91 (s, 3H).  $^{13}\text{C}$  NMR (75 MHz,  $\text{CDCl}_3$ )  $\delta$  164.96, 154.11, 135.48, 133.75, 133.23, 133.19, 133.14, 130.61, 130.19, 129.89, 129.34, 129.28, 129.02, 128.63, 128.30, 127.62, 127.49, 126.71, 126.55, 125.89, 89.11, 72.15, 62.17, 44.21. . HRMS (ESI)  $m/z$  calcd for  $\text{C}_{24}\text{H}_{20}\text{Cl}_2\text{N}_2\text{O}_3$  ( $\text{M}+\text{H}$ ) $^+$  455.0924, found 455.0930.



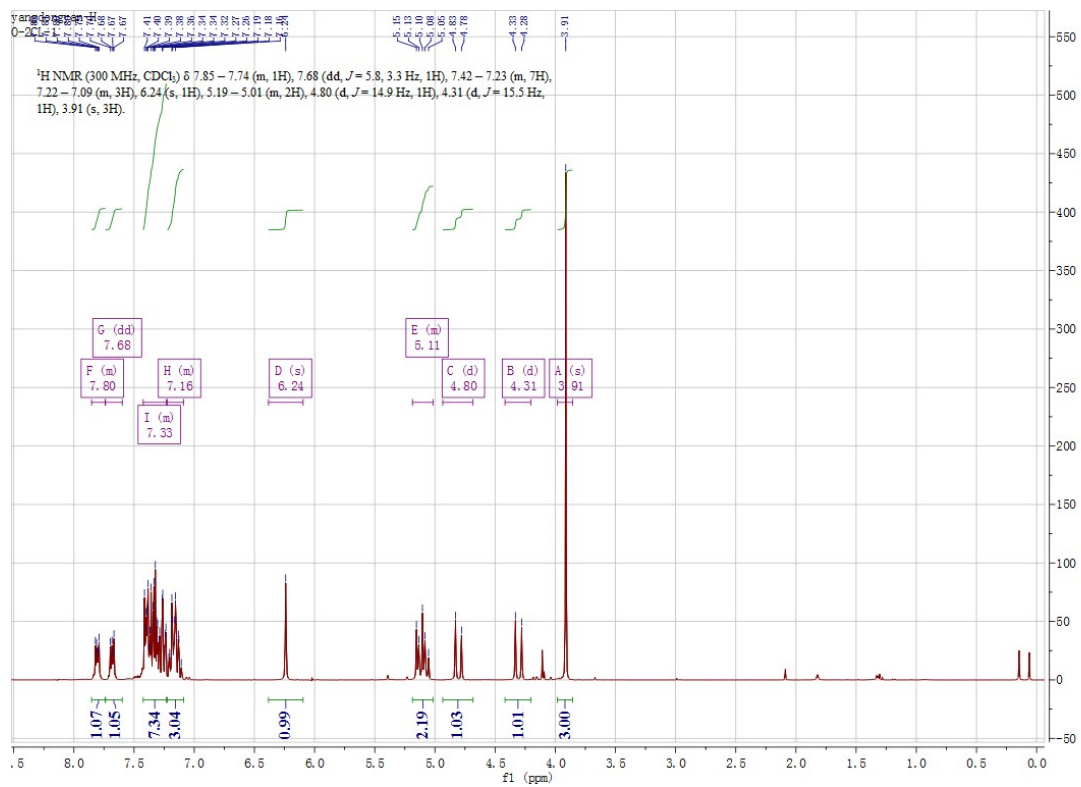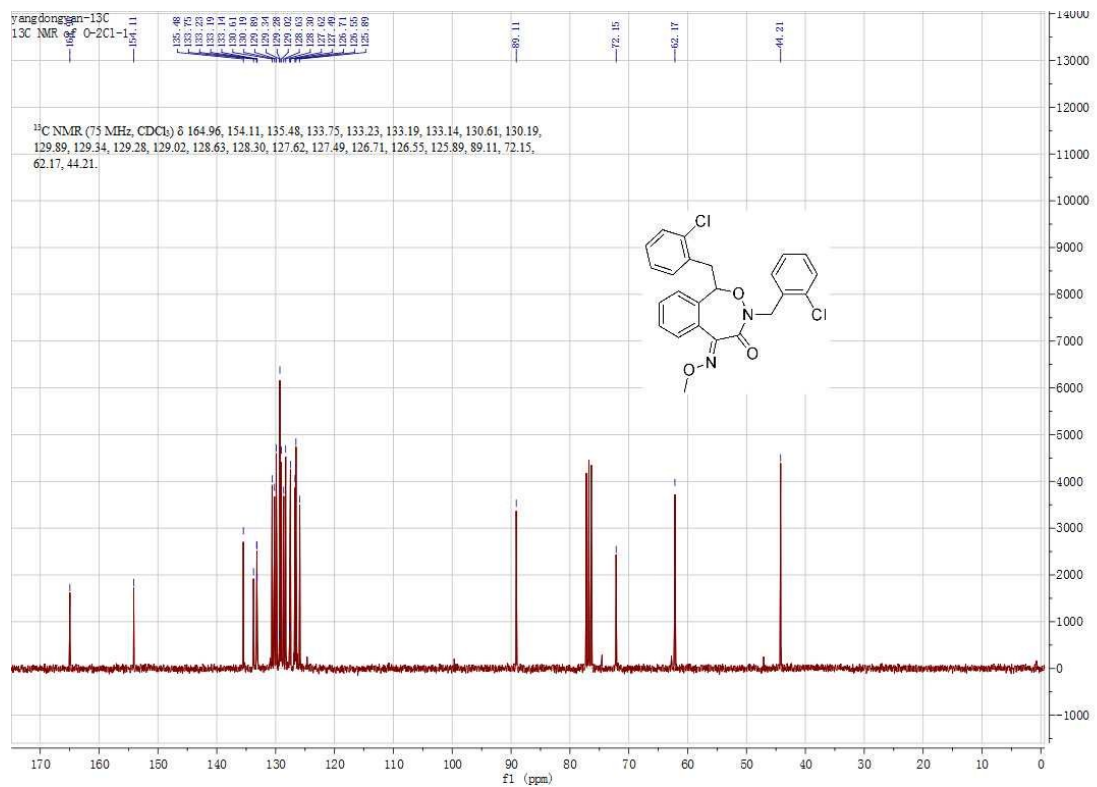

17 #312 RT: 3.38 AV: 1 NL: 3.58E9  
T: FTMS + p ESI Full ms [150.00-1500.00]

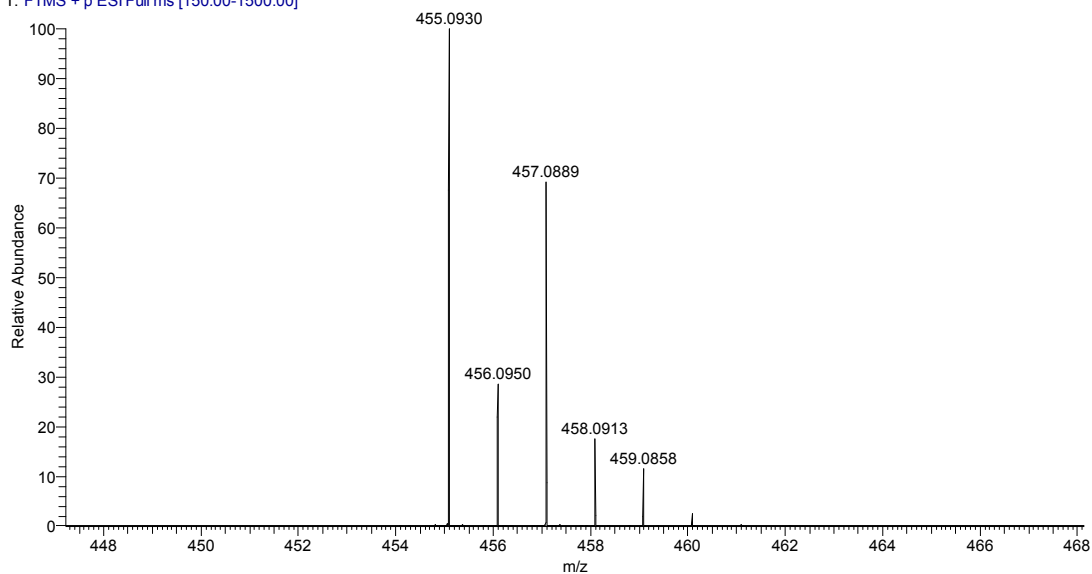

Data for (E)-5-(methoxyimino)-3-methyl-3,5-dihydrobenzo[e][1,2]oxazepin-4(1H)-one (**5-18**): yield 83 %; white solid; mp 106-107 °C;  $^1\text{H NMR}$  (300 MHz,  $\text{CDCl}_3$ )  $\delta$  7.85 – 7.70 (m, 1H), 7.39 (ddd,  $J = 15.3, 10.5, 4.3$  Hz, 2H), 7.13 (d,  $J = 7.6$  Hz, 1H), 5.24 (s, 2H), 4.08 (s, 3H), 3.32 (s, 3H).  $^{13}\text{C NMR}$  (75 MHz,  $\text{CDCl}_3$ )  $\delta$  167.36, 152.08, 135.24, 130.88, 129.63, 126.27, 124.82, 124.65, 73.65, 62.69, 32.44. HRMS (ESI)  $m/z$  calcd for  $\text{C}_{11}\text{H}_{12}\text{N}_2\text{O}_3$  (M+H) $^+$  221.0921, found 221.0919.

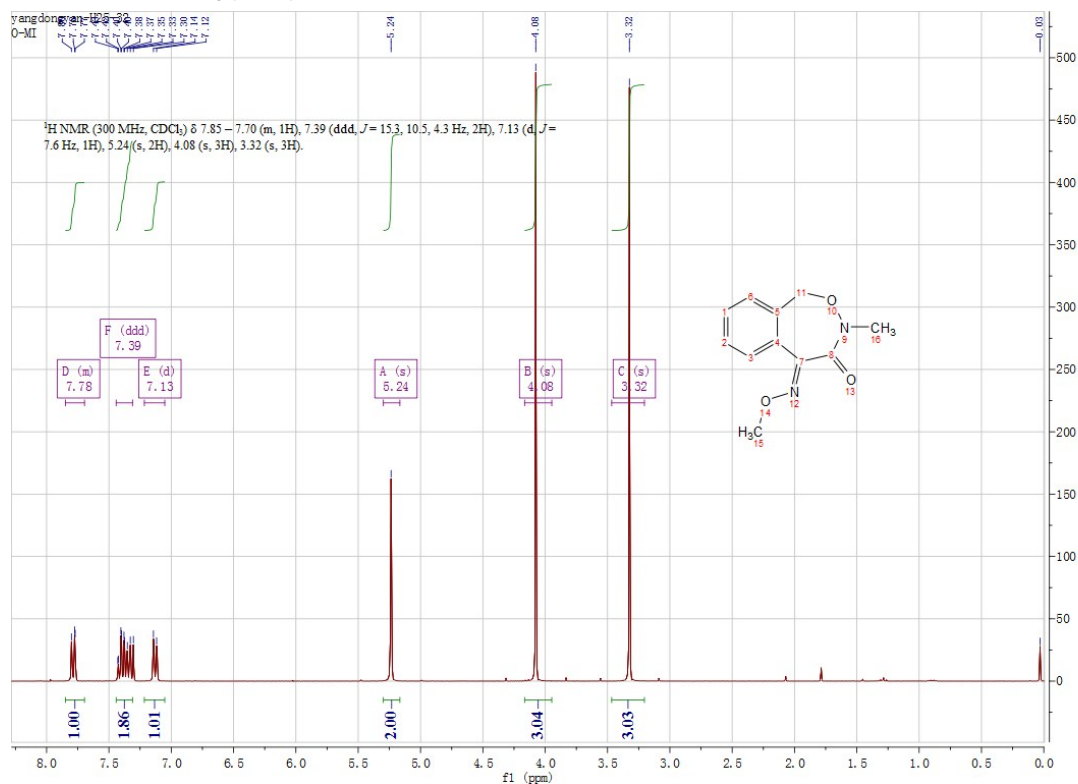

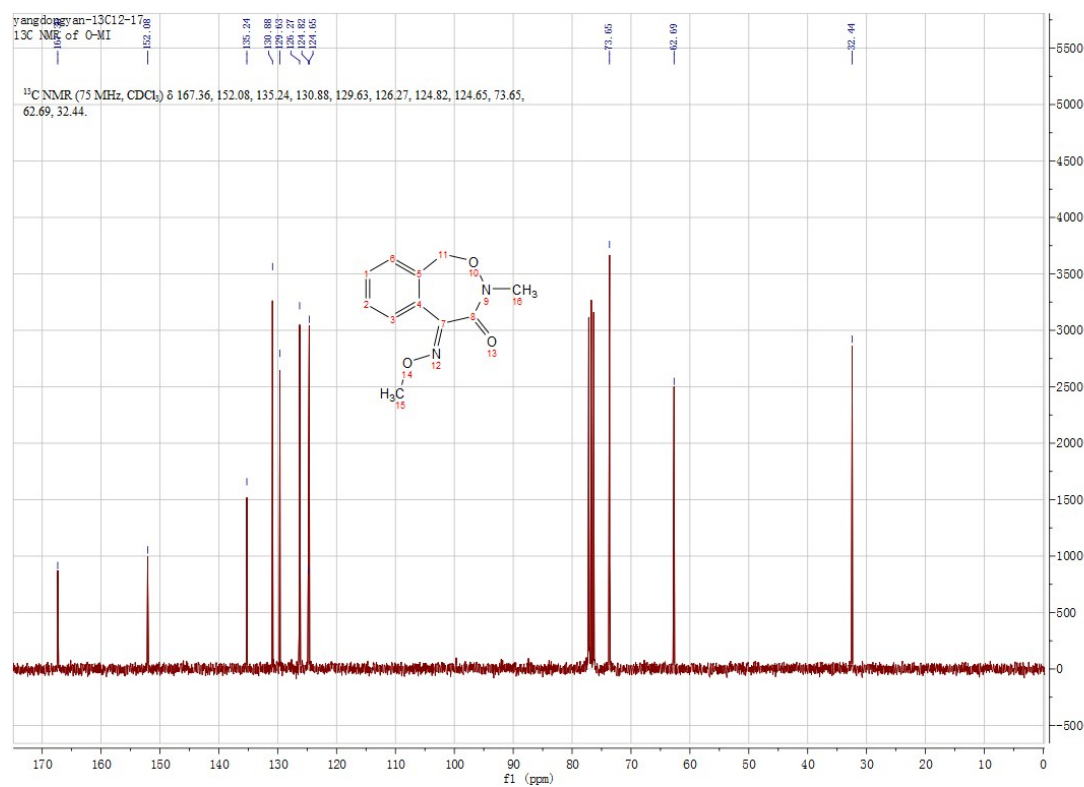

5 #60 RT: 0.64 AV: 1 NL: 1.74E10  
 T: FTMS + p ESI Full ms [150.00-1500.00]

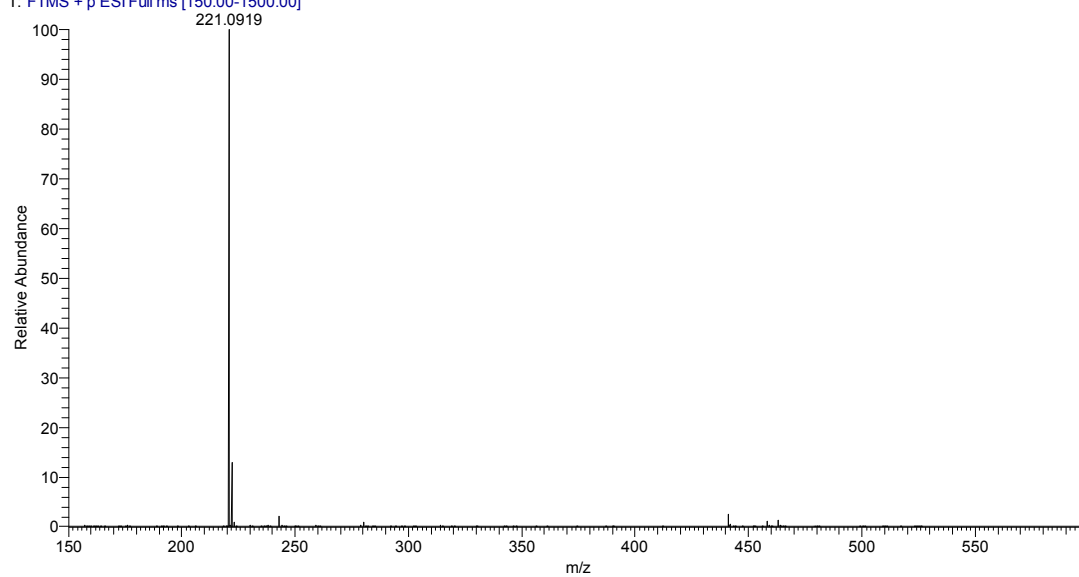

Data for (E)-3-ethyl-5-(methoxyimino)-3,5-dihydrobenzo[e][1,2]oxazepin-4(1H)-one (**5-19**):  
 yield 63 %; white solid; mp 61-62 °C; <sup>1</sup>H NMR (300 MHz, CDCl<sub>3</sub>) δ 7.79 (d, J = 6.8 Hz, 1H), 7.45 - 7.31 (m, 2H), 7.13 (d, J = 7.7 Hz, 1H), 5.25 (s, 2H), 4.08 (s, 3H), 3.77 (q, J = 7.1 Hz, 2H), 1.36 (t, J = 7.1 Hz, 3H). <sup>13</sup>C NMR (75 MHz, CDCl<sub>3</sub>) δ 167.38, 152.40, 135.34, 130.89, 129.59, 126.23, 124.94, 124.58, 74.57, 62.65, 40.94, 11.68. HRMS (ESI) m/z calcd for C<sub>12</sub>H<sub>14</sub>N<sub>2</sub>O<sub>3</sub> (M+H)<sup>+</sup> 235.1070, found 235.1070.

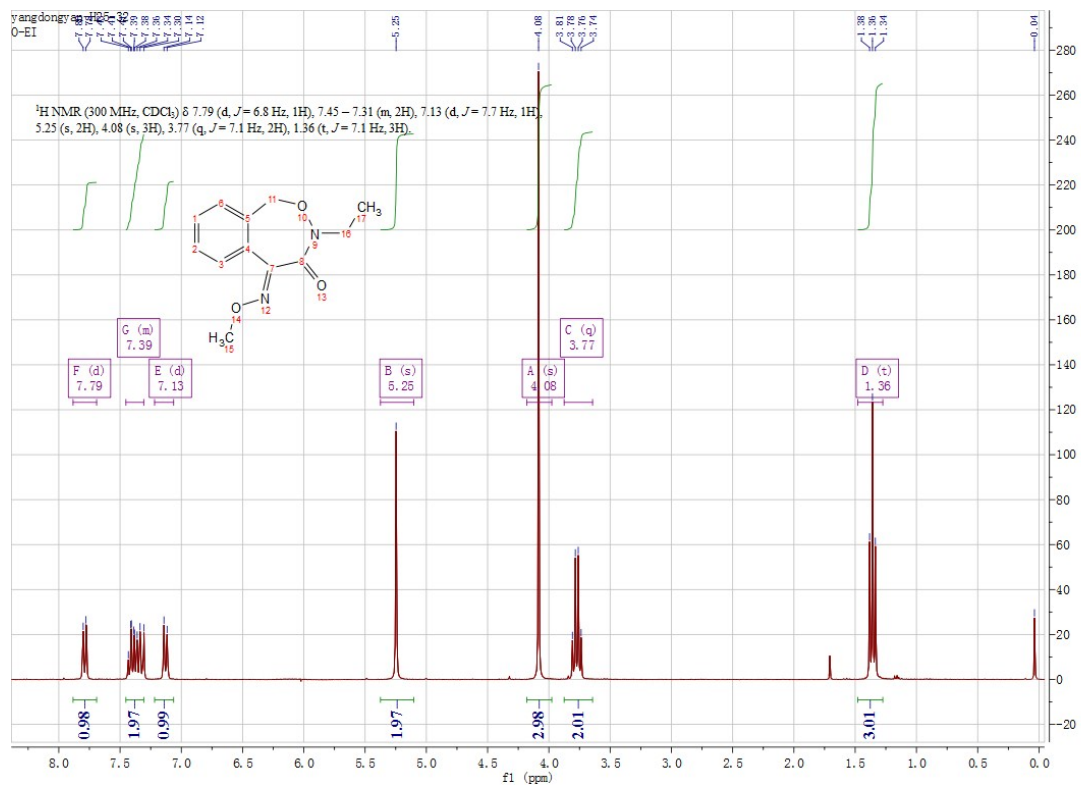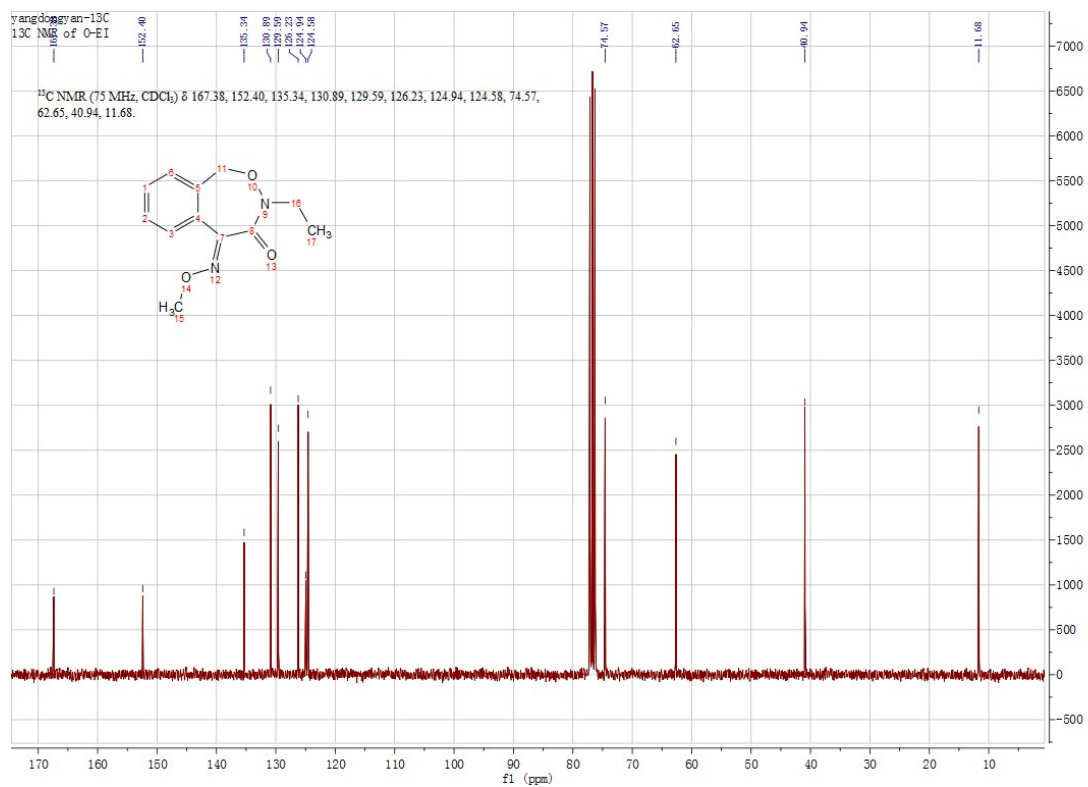

6 #68 RT: 0.72 AV: 1 NL: 1.72E10  
T: FTMS + p ESI Full ms [150.00-1500.00]

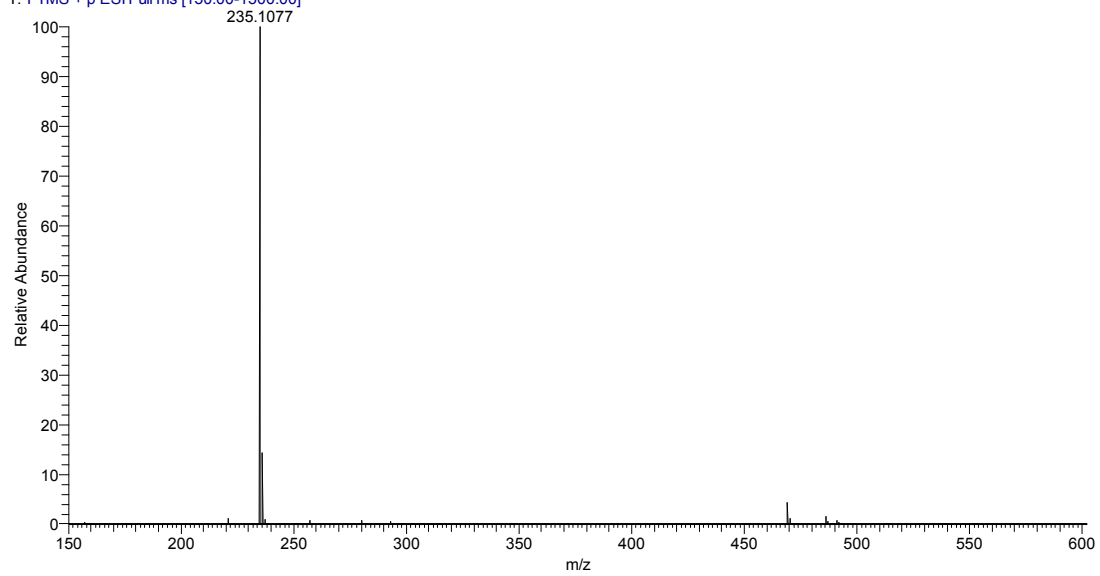

## Single crystal X-Ray data for compound 5-09

**Table 1:** Crystal data and structure refinement for (5-09)

|                                         |                                                                 |
|-----------------------------------------|-----------------------------------------------------------------|
| Identification code                     | (5-09)                                                          |
| Empirical formula                       | C <sub>17</sub> H <sub>15</sub> ClN <sub>2</sub> O <sub>3</sub> |
| Formula weight                          | 330.76                                                          |
| Temperature / K                         | 104.8                                                           |
| Crystal system                          | orthorhombic                                                    |
| Space group                             | P2 <sub>1</sub> 2 <sub>1</sub> 2 <sub>1</sub>                   |
| a / Å, b / Å, c / Å                     | 8.7758(3), 10.3761(4),<br>12.7000(2)                            |
| α / °, β / °, γ / °                     | 90.00, 90.00, 90.00                                             |
| Volume / Å <sup>3</sup>                 | 1529.75(10)                                                     |
| Z                                       | 4                                                               |
| ρ <sub>calc</sub> / mg mm <sup>-3</sup> | 1.436                                                           |
| μ / mm <sup>-1</sup>                    | 0.267                                                           |
| F(000)                                  | 688                                                             |
| Crystal size / mm <sup>3</sup>          | 0.30 × 0.25 × 0.24                                              |
| 2θ range for data collection            | 6.54 to 52°                                                     |
| Index ranges                            | -10 ≤ h ≤ 10, -12 ≤ k ≤ 10,<br>-11 ≤ l ≤ 11                     |
| Reflections collected                   | 6446                                                            |
| Independent reflections                 | 3009 [R(int) = 0.0255 (inf-0.9Å)]                               |
| Data/restraints/parameters              | 3009/0/209                                                      |
| Goodness-of-fit on F <sup>2</sup>       | 1.043                                                           |

|                                                                    |                                  |
|--------------------------------------------------------------------|----------------------------------|
| Final R indexes [ $I > 2\sigma(I)$ i.e. $\sigma(I) > 2\sigma(I)$ ] | $R_1 = 0.0306$ , $wR_2 = 0.0655$ |
| Final R indexes [all data]                                         | $R_1 = 0.0337$ , $wR_2 = 0.0675$ |
| Largest diff. peak/hole / $e \text{ \AA}^{-3}$                     | 0.174/-0.195                     |
| Flack Parameters                                                   | 0.00(5)                          |
| Completeness                                                       | 0.997                            |

Table 2 Fractional Atomic Coordinates ( $\times 10^4$ ) and Equivalent Isotropic Displacement Parameters ( $\text{\AA}^2 \times 10^3$ ) for (5-09).  $U_{eq}$  is defined as 1/3 of the trace of the orthogonalised  $U_{IJ}$  tensor.

| Atom | $x$         | $y$         | $z$         | $U(eq)$   |
|------|-------------|-------------|-------------|-----------|
| C11  | 5466.1(5)   | 4290.5(5)   | 345.5(3)    | 21.05(12) |
| O3   | 7387.5(14)  | -1527.3(12) | -3836.8(7)  | 16.5(3)   |
| N2   | 7990.7(15)  | -555.3(16)  | -3347.5(8)  | 15.2(3)   |
| O1   | 6722.2(13)  | 2584.6(13)  | -3564.9(7)  | 16.3(3)   |
| O2   | 10112.4(13) | 1370.5(13)  | -2817.3(7)  | 18.6(3)   |
| C3   | 8096.8(17)  | 712.9(18)   | -4606.2(10) | 13.4(4)   |
| C14  | 6369.0(18)  | 4144.0(19)  | -578.5(10)  | 15.3(4)   |
| N1   | 8242.5(16)  | 2664.9(16)  | -3285.7(9)  | 15.7(3)   |
| C4   | 7411.2(19)  | 1835.4(19)  | -4908.6(10) | 14.8(4)   |
| C5   | 6687(2)     | 2861.9(19)  | -4400.0(11) | 17.0(4)   |

|     |             |              |              |          |
|-----|-------------|--------------|--------------|----------|
| C12 | 6565 (2)    | 4747.5 (18)  | -1943.7 (10) | 16.0 (4) |
| C6  | 8677.5 (19) | -201.0 (19)  | -5137.5 (10) | 16.0 (4) |
| C2  | 8278.8 (18) | 479.3 (18)   | -3732.7 (10) | 13.3 (4) |
| C9  | 7304 (2)    | 1991 (2)     | -5732.8 (11) | 19.6 (4) |
| C10 | 8602.6 (19) | 3826.0 (17)  | -2837.1 (10) | 15.5 (4) |
| C8  | 7847 (2)    | 1061 (2)     | -6251.1 (11) | 21.4 (4) |
| C15 | 7575 (2)    | 3298.8 (19)  | -663.0 (11)  | 17.4 (4) |
| C11 | 7790.9 (19) | 3918.6 (17)  | -2044.7 (10) | 13.4 (4) |
| C1  | 8962.3 (19) | 1521.5 (18)  | -3214.5 (10) | 13.8 (4) |
| C17 | 6885 (2)    | -2564.8 (19) | -3338.3 (11) | 19.2 (4) |
| C7  | 8545 (2)    | -39 (2)      | -5951.3 (11) | 20.0 (4) |
| C13 | 5849 (2)    | 4878.6 (19)  | -1210.8 (11) | 18.1 (4) |
| C16 | 8285 (2)    | 3192.8 (19)  | -1399.0 (11) | 17.6 (4) |



Table 3 Anisotropic Displacement Parameters ( $\text{\AA}^2 \times 10^3$ ) for (5-09).  
 The Anisotropic displacement factor exponent takes the form:  $-2\pi^2 [h^2 a^2 U_{11} + \dots + 2hka \times b \times U_{12}]$

| Atom | $U_{11}$ | $U_{22}$  | $U_{33}$  | $U_{23}$ | $U_{13}$  | $U_{12}$ |
|------|----------|-----------|-----------|----------|-----------|----------|
| C11  | 20.8 (2) | 26.6 (3)  | 15.8 (2)  | -1.4 (2) | 4.16 (18) | -1.4 (2) |
| O3   | 24.0 (6) | 10.6 (7)  | 14.9 (6)  | -1.3 (5) | -2.8 (5)  | -4.9 (6) |
| N2   | 17.3 (7) | 13.0 (9)  | 15.4 (7)  | -3.4 (7) | -1.4 (6)  | 0.5 (7)  |
| O1   | 12.2 (5) | 20.5 (8)  | 16.1 (6)  | -0.5 (6) | -1.3 (5)  | 0.5 (6)  |
| O2   | 19.4 (6) | 17.7 (7)  | 18.6 (6)  | -1.1 (6) | -7.1 (5)  | 1.3 (5)  |
| C3   | 12.3 (7) | 14.0 (9)  | 14.0 (8)  | 1.1 (8)  | -1.3 (7)  | -2.8 (7) |
| C14  | 15.4 (8) | 16.4 (10) | 13.9 (8)  | -2.5 (8) | 1.8 (7)   | -5.8 (8) |
| N1   | 12.4 (7) | 17.3 (9)  | 17.4 (8)  | -3.6 (7) | -3.2 (6)  | 0.7 (6)  |
| C4   | 11.7 (8) | 17.3 (10) | 15.5 (9)  | 0.8 (8)  | -1.2 (7)  | -4.1 (8) |
| C5   | 17.7 (8) | 15.2 (10) | 18.2 (9)  | 2.7 (8)  | -6.0 (8)  | 1.3 (8)  |
| C12  | 17.0 (8) | 14.9 (10) | 16.2 (9)  | 3.1 (8)  | -1.6 (8)  | -0.8 (8) |
| C6   | 14.9 (8) | 15.9 (10) | 17.3 (9)  | -0.7 (8) | 0.8 (7)   | -1.9 (8) |
| C2   | 10.6 (7) | 15.5 (11) | 13.9 (8)  | 0.0 (7)  | 0.1 (7)   | 0.7 (7)  |
| C9   | 18.4 (9) | 21.6 (11) | 18.7 (10) | 7.1 (9)  | -3.0 (8)  | -4.0 (8) |
| C10  | 19.3 (9) | 12.1 (10) | 14.9 (9)  | -1.2 (7) | -0.2 (7)  | -1.9 (8) |
| C8   | 21.0 (9) | 30.8 (12) | 12.4 (9)  | 2.5 (8)  | -0.9 (7)  | -7.3 (8) |

|     |           |           |           |          |          |          |
|-----|-----------|-----------|-----------|----------|----------|----------|
| C15 | 21.5 (9)  | 15.3 (10) | 15.6 (9)  | 1.5 (8)  | -2.9 (8) | -1.0 (8) |
| C11 | 16.2 (8)  | 10.4 (9)  | 13.6 (9)  | -2.6 (7) | -0.7 (7) | -3.9 (7) |
| C1  | 15.9 (8)  | 15.3 (10) | 10.2 (8)  | 1.5 (7)  | 3.1 (7)  | -1.4 (7) |
| C17 | 25.4 (10) | 14.1 (10) | 18.1 (10) | 0.5 (8)  | -0.7 (8) | -5.2 (8) |
| C7  | 18.9 (9)  | 25.8 (12) | 15.2 (9)  | -3.6 (8) | 1.7 (8)  | -5.4 (9) |
| C13 | 16.1 (8)  | 16.6 (10) | 21.7 (10) | -1.4 (8) | 1.4 (8)  | -0.7 (8) |
| C16 | 19.6 (8)  | 13.7 (10) | 19.5 (10) | -0.3 (8) | -0.1 (8) | 4.9 (8)  |

Table 4 Bond Lengths for (5-09).

| Atom | Atom | Length/Å    | Atom | Atom | Length/Å  |
|------|------|-------------|------|------|-----------|
| C11  | C14  | 1.7494 (17) | N1   | C1   | 1.349 (2) |
| O3   | N2   | 1.4048 (19) | C4   | C5   | 1.506 (3) |
| O3   | C17  | 1.434 (2)   | C4   | C9   | 1.397 (2) |
| N2   | C2   | 1.279 (2)   | C12  | C11  | 1.388 (2) |
| O1   | N1   | 1.4167 (17) | C12  | C13  | 1.389 (3) |
| O1   | C5   | 1.432 (2)   | C6   | C7   | 1.382 (2) |
| O2   | C1   | 1.220 (2)   | C2   | C1   | 1.512 (2) |
| C3   | C4   | 1.406 (3)   | C9   | C8   | 1.384 (3) |
| C3   | C6   | 1.398 (2)   | C10  | C11  | 1.513 (2) |
| C3   | C2   | 1.496 (2)   | C8   | C7   | 1.390 (3) |
| C14  | C15  | 1.382 (3)   | C15  | C16  | 1.389 (3) |
| C14  | C13  | 1.385 (3)   | C11  | C16  | 1.390 (2) |
| N1   | C10  | 1.456 (2)   |      |      |           |

Table 5 Bond Angles for (5-09).

| Atom | Atom | Atom | Angle/°    | Atom | Atom | Atom | Angle/°    |
|------|------|------|------------|------|------|------|------------|
| N2   | O3   | C17  | 108.25(12) | C7   | C6   | C3   | 121.22(18) |
| C2   | N2   | O3   | 112.40(13) | N2   | C2   | C3   | 127.69(16) |
| N1   | O1   | C5   | 109.43(12) | N2   | C2   | C1   | 112.79(15) |
| C4   | C3   | C2   | 122.30(16) | C3   | C2   | C1   | 119.42(15) |
| C6   | C3   | C4   | 119.15(16) | C8   | C9   | C4   | 121.33(19) |
| C6   | C3   | C2   | 118.52(16) | N1   | C10  | C11  | 113.95(14) |
| C15  | C14  | C11  | 119.56(14) | C9   | C8   | C7   | 119.74(17) |
| C15  | C14  | C13  | 121.52(16) | C14  | C15  | C16  | 119.03(17) |
| C13  | C14  | C11  | 118.92(14) | C12  | C11  | C10  | 120.79(16) |
| O1   | N1   | C10  | 115.12(14) | C12  | C11  | C16  | 118.82(16) |
| C1   | N1   | O1   | 114.74(14) | C16  | C11  | C10  | 120.37(16) |
| C1   | N1   | C10  | 125.45(14) | O2   | C1   | N1   | 123.28(17) |
| C3   | C4   | C5   | 124.16(16) | O2   | C1   | C2   | 123.44(17) |
| C9   | C4   | C3   | 118.84(18) | N1   | C1   | C2   | 113.07(15) |

|     |     |     |            |     |     |     |            |
|-----|-----|-----|------------|-----|-----|-----|------------|
| C9  | C4  | C5  | 116.89(17) | C6  | C7  | C8  | 119.68(18) |
| 01  | C5  | C4  | 113.86(15) | C14 | C13 | C12 | 118.50(17) |
| C11 | C12 | C13 | 121.31(17) | C15 | C16 | C11 | 120.80(17) |

Table 6 Torsion Angles for (5-09).

| <b>A</b> | <b>B</b> | <b>C</b> | <b>D</b> | <b>Angle/°</b> |
|----------|----------|----------|----------|----------------|
| C11      | C14      | C15      | C16      | -179.86(14)    |
| C11      | C14      | C13      | C12      | -179.46(14)    |
| 03       | N2       | C2       | C3       | -2.4(2)        |
| 03       | N2       | C2       | C1       | -178.69(13)    |
| N2       | C2       | C1       | O2       | 55.6(2)        |
| N2       | C2       | C1       | N1       | -129.43(16)    |
| 01       | N1       | C10      | C11      | 67.20(19)      |
| 01       | N1       | C1       | O2       | -162.21(14)    |
| 01       | N1       | C1       | C2       | 22.8(2)        |
| C3       | C4       | C5       | O1       | -1.4(2)        |
| C3       | C4       | C9       | C8       | 0.4(3)         |
| C3       | C6       | C7       | C8       | 1.2(3)         |
| C3       | C2       | C1       | O2       | -121.05(19)    |

|     |     |     |     |              |
|-----|-----|-----|-----|--------------|
| C3  | C2  | C1  | N1  | 53.9 (2)     |
| C14 | C15 | C16 | C11 | -0.3 (3)     |
| N1  | 01  | C5  | C4  | 69.47 (19)   |
| N1  | C10 | C11 | C12 | -104.76 (19) |
| N1  | C10 | C11 | C16 | 76.7 (2)     |
| C4  | C3  | C6  | C7  | -2.1 (2)     |
| C4  | C3  | C2  | N2  | 134.29 (19)  |
| C4  | C3  | C2  | C1  | -49.6 (2)    |
| C4  | C9  | C8  | C7  | -1.4 (3)     |
| C5  | 01  | N1  | C10 | 103.84 (16)  |
| C5  | 01  | N1  | C1  | -99.02 (17)  |
| C5  | C4  | C9  | C8  | -175.91 (16) |
| C12 | C11 | C16 | C15 | -0.5 (3)     |
| C6  | C3  | C4  | C5  | 177.34 (16)  |
| C6  | C3  | C4  | C9  | 1.3 (2)      |
| C6  | C3  | C2  | N2  | -47.9 (2)    |
| C6  | C3  | C2  | C1  | 128.19 (17)  |
| C2  | C3  | C4  | C5  | -4.9 (3)     |
| C2  | C3  | C4  | C9  | 179.08 (16)  |
| C2  | C3  | C6  | C7  | -179.97 (16) |
| C9  | C4  | C5  | 01  | 174.77 (15)  |
| C9  | C8  | C7  | C6  | 0.6 (3)      |
| C10 | N1  | C1  | 02  | -7.8 (3)     |

|     |     |     |     |              |
|-----|-----|-----|-----|--------------|
| C10 | N1  | C1  | C2  | 177.22 (15)  |
| C10 | C11 | C16 | C15 | 178.13 (17)  |
| C15 | C14 | C13 | C12 | 0.3 (3)      |
| C11 | C12 | C13 | C14 | -1.1 (3)     |
| C1  | N1  | C10 | C11 | -87.1 (2)    |
| C17 | O3  | N2  | C2  | -171.16 (15) |
| C13 | C14 | C15 | C16 | 0.4 (3)      |
| C13 | C12 | C11 | C10 | -177.42 (16) |
| C13 | C12 | C11 | C16 | 1.2 (3)      |

Table 7 Hydrogen Atom Coordinates ( $\text{\AA} \times 10^4$ ) and Isotropic Displacement Parameters ( $\text{\AA}^2 \times 10^3$ ) for (5-09).

| Atom | <i>x</i> | <i>y</i> | <i>z</i> | U(eq) |
|------|----------|----------|----------|-------|
| H5A  | 7220     | 3689     | -4495    | 20    |
| H5B  | 5613     | 2972     | -4567    | 20    |
| H12  | 6208     | 5235     | -2385    | 19    |
| H6   | 9172     | -947     | -4935    | 19    |
| H9   | 6848     | 2749     | -5942    | 23    |
| H10A | 8330     | 4587     | -3163    | 19    |
| H10B | 9716     | 3854     | -2743    | 19    |

|      |      |       |       |    |
|------|------|-------|-------|----|
| H8   | 7744 | 1175  | -6810 | 26 |
| H15  | 7913 | 2797  | -224  | 21 |
| H17A | 6576 | -3296 | -3671 | 29 |
| H17B | 6016 | -2278 | -3017 | 29 |
| H17C | 7718 | -2829 | -2986 | 29 |
| H7   | 8929 | -677  | -6304 | 24 |
| H13  | 5022 | 5459  | -1145 | 22 |
| H16  | 9118 | 2617  | -1462 | 21 |

## Experimental

Single crystals of  $C_{17}H_{15}ClN_2O_3$  [(5-09)] were recrystallised from [dichloromethane/n-hexane] mounted in inert oil and transferred to the cold gas stream of the diffractometer.

### Crystal structure determination of [(5-09)]

**Crystal Data.**  $C_{17}H_{15}ClN_2O_3$ ,  $M=330.76$ , orthorhombic,  $a = 8.7758(3) \text{ \AA}$ ,  $b = 10.3761(4) \text{ \AA}$ ,  $c = 16.7996(6) \text{ \AA}$ ,  $U = 1529.75(10) \text{ \AA}^3$ ,  $T = 104.8$ , space group  $P2_12_12_1$  (no. 19),  $Z = 4$ ,  $\mu(\text{Mo K}\alpha) = 0.267$ , 6446 reflections measured, 3009 unique ( $R_{\text{int}} = 0.0255$ ) which were used in all calculations. The final  $wR(F_2)$  was 0.0675 (all data).
